# Supplementary material
Source: PubMed Central journal article supplement (PMC7414162)
Supplement: pnas.1919379117.sapp.pdf [file pnas.1919379117.sapp.pdf]

# PNAS

www.pnas.org

Supplementary Information for

T-box transcription factor 3 governs a transcriptional program for the function of the mouse atrioventricular conduction system

Rajiv A. Mohan\*,<sup>1,2</sup> MSc, Fernanda M. Bosada\*,<sup>1</sup> PhD, Jan H. van Weerd,<sup>1</sup> MSc, Karel van Duijvenboden,<sup>1</sup> PhD, Jianan Wang,<sup>2</sup> MSc, Mathilda T. M. Mommersteeg,<sup>3</sup> PhD, Ingeborg B. Hooijkaas,<sup>1</sup> MSc, Vincent Wakker,<sup>1</sup> BSc, Corrie de Gier-de Vries,<sup>1</sup> BSc, Ruben Coronel,<sup>2</sup> MD, PhD, Gerard J. J. Boink,<sup>1,2</sup> MD, PhD, Jeroen Bakkers,<sup>4</sup> PhD, Phil Barnett,<sup>1</sup> PhD, Bas J. Boukens,<sup>1</sup> PhD, Vincent M. Christoffels,<sup>1</sup> PhD

\* contributed equally

<sup>1</sup> Department of Medical Biology, Amsterdam University Medical Centers, University of Amsterdam, Amsterdam, The Netherlands.

<sup>2</sup> Department of Clinical and Experimental Cardiology, Amsterdam University Medical Centers, University of Amsterdam, Amsterdam, The Netherlands.

<sup>3</sup> Burdon Sanderson Cardiac Science Centre, Department of Physiology, Anatomy & Genetics, University of Oxford, Oxford, United Kingdom.

<sup>4</sup> Hubrecht Institute-KNAW, University Medical Centre Utrecht, Utrecht, The Netherlands

Corresponding author:

Vincent M. Christoffels

Department of Medical Biology

Amsterdam University Medical Centers

University of Amsterdam

Meibergdreef 15 Room K2-119

1105 AZ Amsterdam

The Netherlands

v.m.christoffels@amc.uva.nl

**This PDF file includes:**

Supplementary text

Figures S1 to S13

Table S1

SI References

## Supplementary Information Text

### Detailed Methods

#### Genetically modified mouse lines

*Tbx3<sup>CreERT2</sup>*, *Tbx3<sup>Venus</sup>*, *Tg(RP23-366H17-Tbx3-egfp)1Vmc* (*BAC-Tbx3-Egfp*) and *BAC-336LK* (*BAC-Nppb-Katushka*) have been described previously (1-4). Genotype was screened by PCR. The *Tbx3<sup>CreERT2</sup>* and *Tbx3<sup>wild-type</sup>* alleles were identified using the following primers: forward (AGCGGAGCCAAGCCAGCA), reverse1 (*Tbx3* allele-binding CCTTGGCCTCCAGGTGCAC) and reverse2 (*CreERT2*-binding GCTAGAGCCTGTTTTGCACGTTCA), *Tbx3<sup>Venus</sup>* and *Tbx3<sup>wild-type</sup>* alleles using the following primers: forward (AGCGGAGCCAAGCCAGCA), reverse1 (*Tbx3* allele-binding CCTTGGCCTCCAGGTGCAC) and reverse2 (*Venus* allele-binding TTGATGCCGTTCTTCTGCTTGT), *BAC-Tbx3-Egfp* using the following primers: forward (CGACGTAAACGGCCACAAGTT) and reverse (TTGATGCCGTTCTTCTGCTTGT) and finally *BAC-336LK* using the following primers specific for *Luciferase*: forward (ATCTTCTTCAAGGACGACGG) and reverse (CTGAAATCCCTGGTAATCCGTT). Please note that some primer sequences are the same.

*RE4-5<sup>-/-</sup>*, *RE4<sup>-/-</sup>*, *RE5<sup>-/-</sup>*, and *RE2<sup>-/-</sup>* mouse lines were generated using CRISPR/Cas9 genome editing. Guide RNA constructs were designed using ZiFiT Targeter (5). The target sequences are the following: guide 1 (GGGCACATCCCTCAGCAGCC), guide 2 (GGCCAACCTCTCACTGCTGA), guide 3 (GGCCCAATTAGAAGCCACCC), guide 4 (GGATCCAGAGTCCAGACAGC), guide 5 (GGCTAAAGGAGACTGCTCTC). *RE4-5* deletion was generated using guides 1 and 3, *RE4* with 1 and 2, *RE5* with 2 and 3, and *RE2* with 4 and 5. The sgRNA constructs were transcribed *in vitro* using MEGAshortscript T7 (Invitrogen AM1354) and mMessage Machine T7 transcription kit (Invitrogen AM1344) according to manufacturer instructions. One-cell FVB/NRj zygotes were microinjected with 10 ng/μL each sgRNA and 25 ng/μL Cas9 mRNA to generate mouse founders. All transgenic mice were maintained on a FVB/NJ background commercially obtained from Jackson laboratory (stock number 100800).

Animal care and experiments were in accordance with guidelines from the European Union, Dutch government and Amsterdam University Medical Centers and approved by the Animal Experimental Committee of the Amsterdam University Medical Centers.

#### *In situ* hybridization

Neonates and adults were fixed overnight in 4% paraformaldehyde in PBS, dehydrated in a graded ethanol series, paraffin embedded and sectioned at 12 μm. Methodology of the non-radioactive *in situ* hybridization analysis was described previously.(6) We used probes for the detection of *Hcn4*, *Gja5*, *Tbx3*, and *Cacna1g*. Sections were examined with a Leica DM5000B microscope and photographed with a Leica DFC450 Digital Camera.

#### 3D reconstruction and volume quantification of neonatal and adult AV node and AV bundle

Generating 3D reconstructions of expression patterns has been described previously.(7) In brief, consecutive sections throughout the heart were stained for *Hcn4* and *Gja5* in an alternating fashion. Images were taken of all sections covering the AV conduction system. A set of images covering the entire AV conduction system constituted a 'stack'. In Amira software the AlignSlices module was used to align the sections based on the tissue morphology. The expression domains of *Hcn4* and *Gja5* were labeled. To measure the volumes of *Hcn4<sup>+</sup>* tissue (AV node, AV bundle and BBs)

and *Gja5*<sup>+</sup> tissue (AV bundle and BBs) the MaterialStatistics module was used. The volume of the AV node, AV bundle and BBs was calculated based on *Hcn4*<sup>+</sup> expression multiplied by two times (to compensate for the alternate sections used for *Gja5*). The volume of the AV bundle-BBs was calculated based on *Gja5*<sup>+</sup> expression multiplied by two times (to compensate for the alternate sections used for *Hcn4*). The volume of the AV node was calculated by subtracting the *Gja5*<sup>+</sup> volume from the *Hcn4*<sup>+</sup> volume.  $P < 0.05$  was considered significant using a two-tailed Student's *t* test.

### **Immunohistochemistry**

P28 hearts were fixed overnight in 4% paraformaldehyde in PBS, dehydrated in a graded ethanol series, paraffin embedded and sectioned at 7  $\mu\text{m}$ . Sections were heated for 30 minutes at 60°C and deparaffinized by incubating three times in xylene for seven minutes. Rehydration was performed in an ethanol series (100% ethanol for 3 minutes, and 100% ethanol, 100% ethanol, 96% ethanol, 90% ethanol, 80% ethanol, 70% ethanol and 50% ethanol for 1 minute). After deparaffination and rehydration, the sections were washed in PBS and pressure cooked for 5 minutes in antigen unmasking solution (Vector H-3300) followed by a 30 minutes incubation in PBS-0.2% Triton X100. Sections were blocked for 30 minutes in PBS-4% BSA followed by an overnight incubation with the primary antibodies diluted in PBS-4% BSA. Sections were washed three times for five minutes in PBS-0.05% Tween buffer before incubation for two hours with the secondary antibodies and Dapi diluted in PBS-4% BSA. Afterwards, the sections were washed three times for five minutes with PBS-0.05% Tween buffer and mounted in glycerol/PBS (1:1). Sections were examined and photographed with a fluorescence microscope Leica DM6000 or confocal microscope Leica TCS SP8 X mounted on a Leica DMI8 inverted microscope.

The primary antibodies used were: rabbit-anti-Hcn4 polyclonal (1:200; Millipore, AB5808), goat-anti-Cx40 polyclonal (1:150; Santa Cruz Biotechnology Inc, sc-20466), mouse-anti-CoxIV monoclonal (1:200; Abcam, Ab14744), rabbit-anti-CC3 polyclonal (1:250; Cell signaling, 9661), goat-anti-cTnl polyclonal (1:400; Hytest, 4T21/2). For WGA an Alexa fluor 555 conjugate (1:500; Invitrogen, W32464) was used. The secondary antibodies used were Alexa Fluor 647 donkey-anti-goat IgG (1:200; Invitrogen, A-21477), Alexa Fluor 555 donkey-anti-mouse IgG (1:200; Invitrogen, A-31570), Alexa Fluor 488 donkey-anti-rabbit IgG (1:200; Invitrogen, R37118). Nuclei were stained using Dapi (1:1000; Sigma, D9542).

### **CoxIV measurement in AV node and working myocardium**

Sections were stained for Hcn4, Cx40, CoxIV and Dapi as described above. Images were acquired and loaded into Amira. The AV node was labeled based on Hcn4<sup>+</sup>-Cx40<sup>-</sup>, and part of the working myocardium was based on Hcn4<sup>-</sup>-Cx40<sup>-</sup> and morphology. A background label was made within the lumen. CoxIV average staining intensity was measured per label, per heart using the MaterialStatistics module, background subtracted from AV node and working myocardium labels and normalized to working myocardium. Several sections per heart were used for averages.

### **Recording of *in vivo* and *ex vivo* electrocardiograms**

*Wild-type* and *Tbx3*<sup>+/*Venus*</sup> 2-month-old mice were measured. Anesthesia was induced with 5% Isoflurane (Pharmachemie B.V.) and maintained with 1.5-2.0% Isoflurane. Electrodes were placed at the right (R) and left (L) armpit and the left groin (F) and an electrocardiogram (ECG) was recorded (PowerLab 26T; AD-Instruments, Colorado Springs, CO, USA) for a period of 5 min. ECG parameters were determined in Lead II (L-R) based on the last 60 seconds of the recording.

To study the electrophysiological properties intrinsic to the heart, ECGs were also recorded *ex vivo*. Adult mice were stunned by inhalation of CO<sub>2</sub> and sacrificed by cervical dislocation. The heart was rapidly excised, cannulated, and mounted on a Langendorff perfusion set-up as described previously.<sup>(8)</sup> During perfusion with 37°C Tyrode's solution (128 mmol/L NaCl, 4.7 mmol/L KCl, 1.45 mmol/L CaCl<sub>2</sub>, 0.6 mmol/L MgCl<sub>2</sub>, 27 mmol/L NaHCO<sub>3</sub>, 0.4 mmol/L NaH<sub>2</sub>PO<sub>4</sub>, and 11 mmol/L glucose (pH maintained at 7.4 with a mixture of 95% O<sub>2</sub> and 5% CO<sub>2</sub>), the heart was submerged with the left anterior aspect pointing upward, and electrodes were placed at the right (R) and left (L) side of the base of the heart and at the left side of the apex (F) at an approximately 5 mm distance. ECG parameters were determined in Lead II (L-R) based on the last 30 seconds of the recording using LabChart Pro. *p*<0.05 was considered significant using two-way ANOVA.

To achieve combined beta-adrenergic and muscarinic cholinergic blockade (ANS block), we repeated the ECGs 10 minutes after intraperitoneal injection of 0.5 mg/kg atropine and 1 mg/kg propranolol (A/P). as previously described (9).

Pacing experiments were performed by advancing an octapolar catheter through the esophagus to the site where capture of the atria could be established. The transesophageal stimulation electrodes connected to an isolation unit through which triggered stimulus with variable current output was initiated, and atrial pacing thresholds were determined for each mouse. For sinus node recovery time (SNRT) measurements, a 4-second pacing train with a cycle length of 120 ms was used. SNRT definition: interval between the last pacing stimulus and onset of first sinus return. To control for differences in sinus rate, SNRT was normalized to resting heart rate (cSNRT = SNRT – RR interval). To determine the Wenckebach period (WCL) we applied a 4 second pacing train starting at a cycle length of 100 ms, and decreasing by 2 ms until AV was first observed.

### **Optical mapping**

Adult mice were stunned by inhalation of CO<sub>2</sub> and sacrificed by cervical dislocation. The heart was rapidly excised, cannulated, and mounted on a Langendorff perfusion set-up as described previously (8) and perfused at 37°C with Tyrode's solution containing 10 μM Blebbistatin (Bio-Techne LtD). After approximately 10 minutes recovery, 500 μL Tyrode's solution containing 15 μM Di-4-ANEPPS (Molecular Probes, Eugene, OR) was added to the perfusion solution. Excitation light was provided by a 5-watt power LED (filtered 510 ± 20 nm). Fluorescence light, filtered for >610 nm, was transmitted through a tandem lens system on CMOS sensor (100 x 100 elements, MICAM Ultima). Ventral and dorsal activation patterns were measured during sinus rhythm.

### **Plasmids**

Potential REs (Supplemental Table 1 and 2) were incorporated into a modified pGL2-Basic containing a SV40 minimal promoter and an adjusted multiple cloning site for *in vitro* analysis by a transfection luciferase assay. *Ryr2* RE8, RE9 and RE16 were incorporated into an attB transgenesis vector containing mCherry for a F0 screen in attP<sup>2B</sup> zebrafish (10).

### **Transfection luciferase assays**

Cos-7 and HEK-293 cells (1.5\*10<sup>6</sup> cells/plate) were grown in 48-well plates in DMEM (ThermoFisher Scientific, 31966-021) supplemented with 10% FBS (ThermoFisher Scientific, 10270-106) and Pen/Strep (ThermoFisher Scientific, 15070-063). Cos-7 and HEK-293 cells were transfected using polyethylenimine 25 kDa (PEI, Brunschwig, 23966-2) at a 1:3 ratio (DNA:PEI). HL1 (2.5\*10<sup>6</sup> cells/plate) cells were grown in 48-well plates in Claycomb medium (Sigma-Aldrich, 51800C) supplemented with chemically defined HL-1 FBS substitute (Lonza, 77227), Glutamax

(ThermoFisher Scientific, 35050-061) and Pen/Strep (ThermoFisher Scientific, 15070-063). HL1 cells were transfected using Lipofectamine 3000 (ThermoFisher Scientific, L3000-015). For 240 ng of vector, 0.5  $\mu$ L P3000 reagent and 1.2  $\mu$ L Lipofectamine were added. In a transfection assay 200 ng of reporter construct and 40 ng pcDNA3.1<sup>(+)</sup>-empty vector (ThermoFisher Scientific, V790-20) or 25 ng pcDNA3.1-human TBX3, -Smad1, -Smad4, -Alk3, -Gata4, -Nkx2.5 and -Tbx5 were transfected per well. Forty-eight hours after transfection, cells were lysed using Renilla luciferase assay lysis buffer (Promega, E291A-C) and luciferase activity measured. Luciferase measurements were performed using a GloMax Explorer (Promega, GM3500). During the measurement, 100  $\mu$ L D-Luciferin (p.j.k, 102111) was injected (150  $\mu$ L/second) followed by a 1 second delay and 5 seconds of measurement. Transfections were carried out at least two times and measured in duplicates.

### ***In vivo* zebrafish RE assay**

The plasmids containing *Ryr2* RE8 and RE16 were injected in attP<sup>2B</sup> zebrafish embryos at the 1-cell stage at a final concentration of 15ng/ $\mu$ L in the presence of 25 ng/ $\mu$ L phiC31 transposase mRNA.(10) Embryos were kept at 28.5°C in E3 medium and analyzed for heart-specific GFP, and subsequently RE-specific RFP at 72 hours post-fertilization. GFP positives were selected to grow to adulthood. Once reached adulthood, genotype was assessed by PCR on DNA from fin clippings. The F1 generation embryos were used to investigate the spatiotemporal activity pattern of the REs. Embryos were kept at 28.5°C in E3 medium and analyzed for heart-specific GFP, and subsequently RE-specific RFP followed by imaging 5 days post-fertilization. Hearts were imaged on a confocal microscope (Leica Microsystems, TSC SP8 X) set up with the correct fluorescence filters.

### **Quantitative expression analysis**

Total RNA was isolated from postnatal day 21 whole hearts and brains according to the manufacturer's protocol of the ReliaPrep RNA Tissue Miniprep System (Promega). cDNA was reverse transcribed with oligo dT primers from 500ng of total RNA according to the manufacturer's protocol of the Superscript II Reverse Transcriptase system (Thermo Fisher Scientific, 18064014). Expression levels of candidate target genes were determined by quantitative real-time PCR using a LightCycler 480 Instrument II (Roche Life Science, 05015243001). Primer sets are listed in Supplemental Table 2. Expression levels were measured using LightCycler 480 SYBR Green I Master (Roche, 04887352001) and the primers had a concentration of 1 pmol/L. The amplification protocol consisted of 5 minutes 95 °C followed by 45 cycles of 10 seconds 95°C, 20 seconds 60°C and 20 seconds 72°C. Relative start concentration ( $N_0$ ) was calculated using LinRegPCR.(11) Values were normalized to the geometric mean of two reference genes per experiment (*Hprt*, *Ppia*, and *Rpl32*). (12) See Supplemental Table 3 for qPCR primers. Additionally, *Hcn4* and *Tbx3* were used to correct for dissection variability of CCS tissue preparations.  $P < 0.05$  was considered significant using an one-way ANOVA.

### **Differential expression analysis**

Reads were mapped to mm10 build of the mouse transcriptome using STAR.(13) Differential expression analysis was performed using EdgeR . First, we filtered out genes that did not have 1 TPM or higher for the majority (>3) of samples in a genotype group and excluded genes with an average transcript level higher than 5000 TPM. Based on the EdgeR generated MDS plot, we excluded 2 *wild-type* and 1 *Tbx3*<sup>+/-</sup> samples leaving 5 *wild-type* and 6 *Tbx3*<sup>+/-</sup> AV node samples for differential expression analysis. Multidimensional scaling plot of the samples is given in Supplemental figure 13.

### **Unsupervised hierarchical clustering**

Unsupervised hierarchical clustering was performed on genes differentially expressed between 5 *wild-type* and 6 *Tbx3*<sup>+/-</sup> AV node samples using the R package pheatmap, version 1.0.8. (<http://cran.r-project.org/web/packages/pheatmap/index.html>). DAVID(16) was used to find overrepresented gene ontology (GO) terms and Kegg pathways in the groups of upregulated and downregulated genes from the set of AV node differentially expressed genes. In DAVID, Benjamini–Hochberg correction was performed for multiple testing-controlled p values. Statistically significant enriched terms were functionally grouped and visualized.

### **Differential accessibility analysis**

AV junction and ventricular ATAC-sequencing reads were mapped to mm9 build of the mouse genome using BWA(17); the default settings were used. The BEDTools suite(18) was used to distribute the genome wide signal into bins of 500bp. To allow for differential peak calling between datasets, quantile normalization was applied using the deepTools2 suite(19).

### **Overlap with H3K27ac ChIP-sequencing**

ATAC-sequencing peaks were cross-referenced with PCM1-sorted H3K27ac ChIP-sequencing data(20). Raw ChIP-sequencing reads were extracted from the Sequence Read Archives (GSM851290) and mapped to the mouse genome (mm9) using BWA(17); the default setting were used. Peaks were called and subsequently overlapped with different categories of ATAC-sequencing peaks using the BEDTools suite(18).

### **Principal component analysis to compare different cell types**

HL-1 RNA sequencing data comes from SRA source PRJNA380279(23) and mouse cardiac fibroblast RNA sequencing data from PRJNA378265(24). RNA sequencing of pacemaker cells and chamber cardiomyocytes from (4) . Data were aligned using STAR(13) and principal component analysis output generated using DeSeq2(14) on the Galaxy server (usegalaxy.org).

Supplemental figure 1

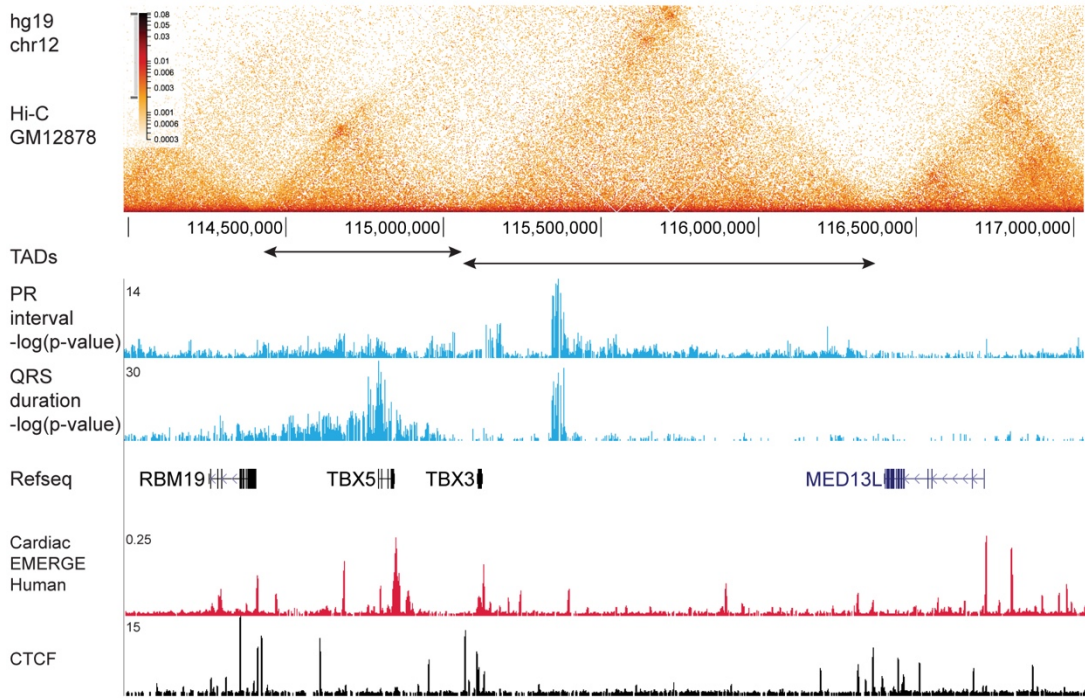

**Fig. S1.** Hi-C heatmap from human lymphoblastoid line GM12878 of a large genomic region including the *TBX3* TAD.  $-\log p$  values of the genetic variants associated with PR interval and QRS duration, human cardiac EMERGE and CTCF ChIP cardiomyocytes.

Supplemental figure 2

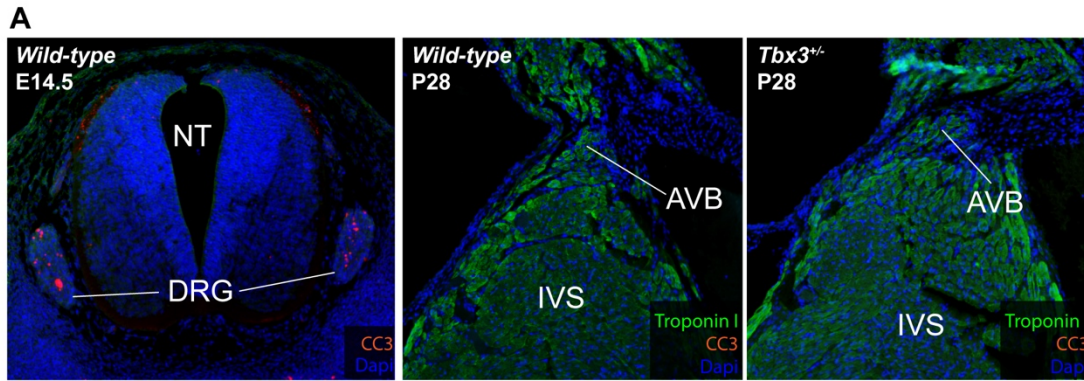

**Fig. S2. Apoptosis is not the underlying mechanism of AV bundle-BB hypoplasia in *Tbx3*<sup>+/-</sup> mice.** (A) P28 Hearts (n=3 for *wild-type* and *Tbx3*<sup>+/-</sup> groups) and E14.5 embryo as positive control stained for nuclei by Dapi (blue) and immunolabeled for cleaved caspase-3 (CC3, red) and Troponin I (green). Apoptotic cells are observed in the DRG of the E14.5 embryo and not detected in the AV bundles of P28 hearts. AVB, AV bundle; DRG, dorsal root ganglia; IVS, interventricular septum; NT, neural tube.



### Supplemental figure 3

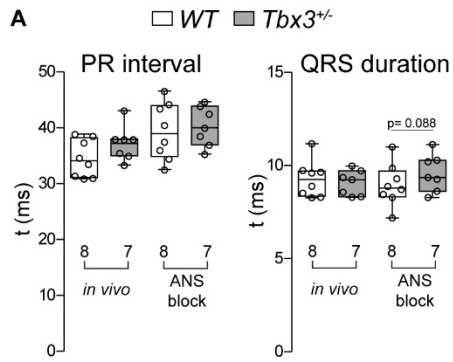

**Fig. S3. ANS blockade has no effect in *in vivo* ECG parameters from *Tbx3*<sup>+/-</sup> mice.** (A) Boxplots show average PR interval and QRS duration before and after ANS block. Data was analyzed with 2-way ANOVA.

Supplemental figure 4

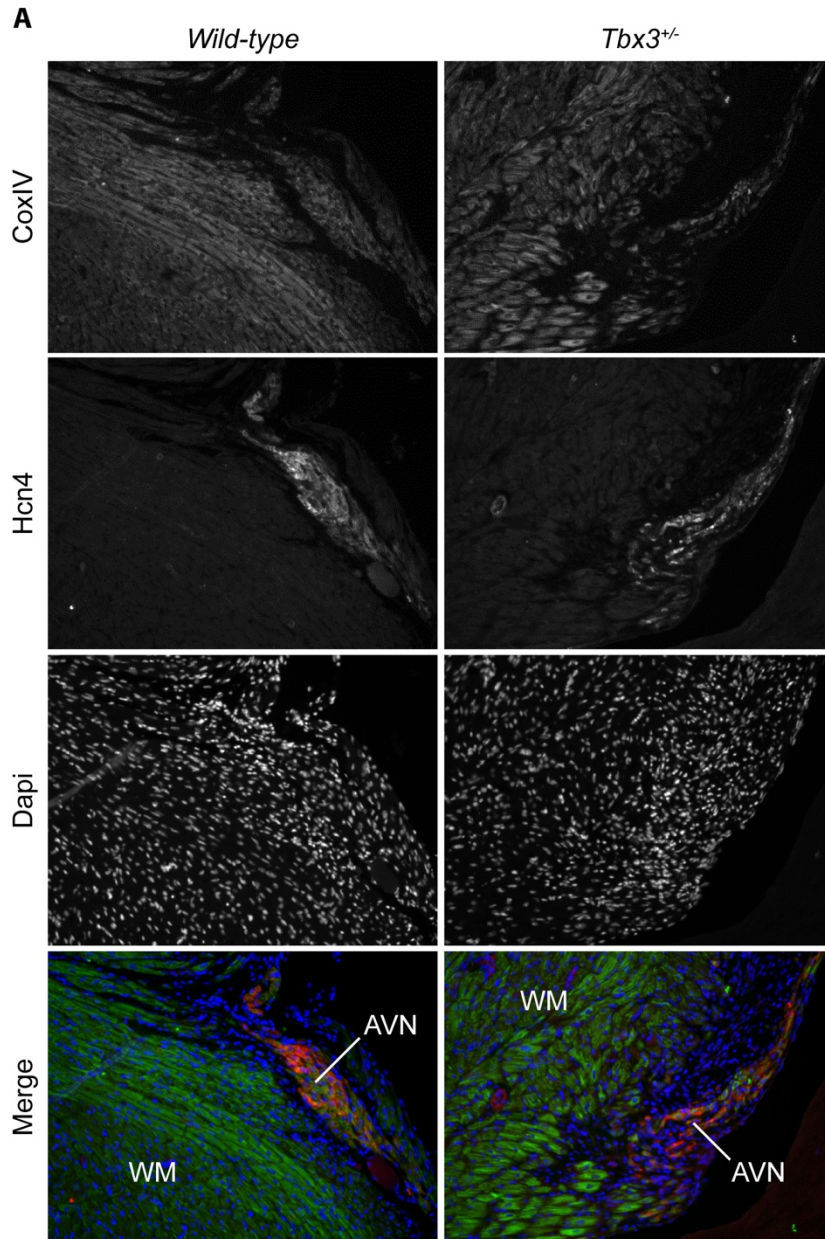

**Fig. S4. Mitochondrial marker levels are not changed in *Tbx3<sup>+/-</sup>* AVN.** Representative histological sections from *wild-type* and *Tbx3<sup>+/-</sup>* hearts immunostained for Hcn4 (red), CoxIV (green) and nuclei (blue). AVN, AV node; WM, working myocardium.

## Supplemental figure 5

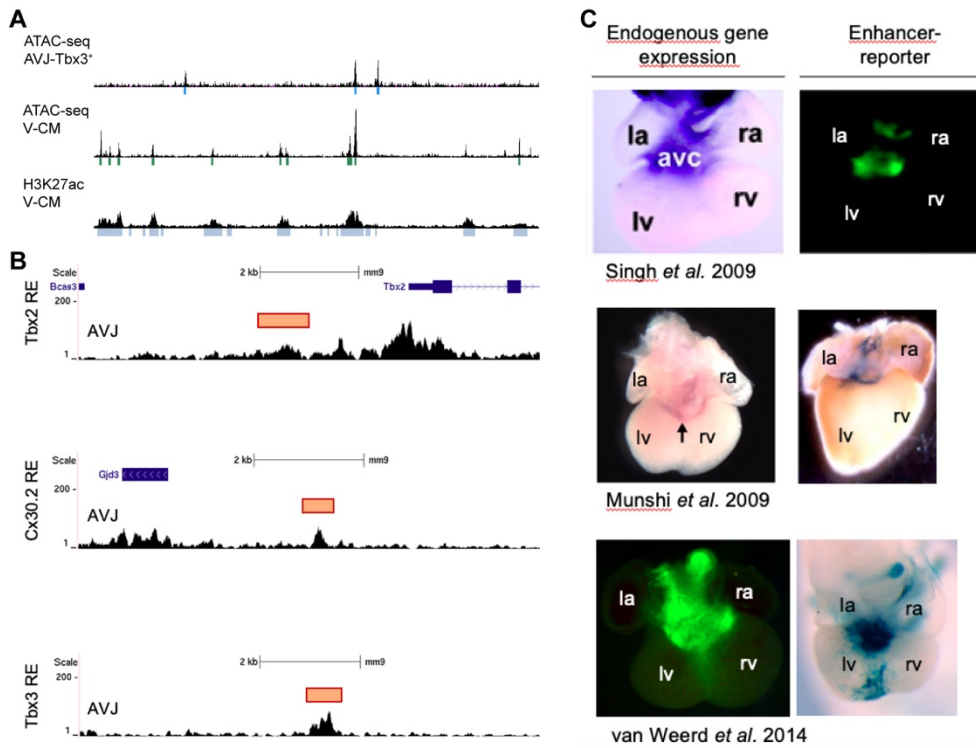

**Fig. S5. Established AV conduction system REs are identified in ATAC-sequencing dataset.**

(A) Representative example in *Tnni3k* locus showing peaks (black) and called peaks (colored bars) for several ATAC-sequencing and ChIP-sequencing datasets. (B, C) ATAC-sequencing on AV conduction system cardiomyocytes identifies previously established AV conduction system-specific REs for *Tbx2* (top)(25), *Gjd3* (middle)(26) and *Tbx3* (bottom)(27). AVC, atrioventricular canal; AVJ, atrioventricular junction; LA, left atrium; LV, left ventricle; RA, right atrium; RE, regulatory DNA element; RV, right ventricle.

**Supplemental figure 6**

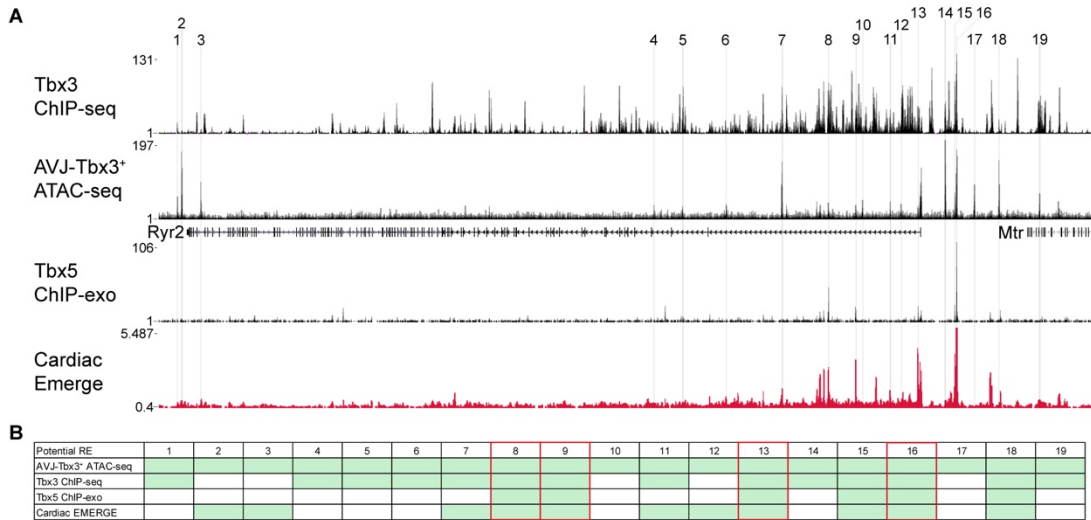

**Fig. S6. A large genomic region including *Ryr2* scored for potential AV conduction system REs.** (A) Genomic region including *Ryr2* is shown with Tbx3 and Tbx5 ChIP-sequencing signals, cardiac EMERGE and AV conduction system-ATAC-sequencing signals. Potential REs were selected based on accessible chromatin in the AV conduction system and at least one additional peak and are shown above. (B) After the initial screen, we continued by scoring for Tbx3 and Tbx5 occupancy and cardiac EMERGE. Signal strength of Tbx3, Tbx5 ChIP-sequencing and cardiac EMERGE were taken into consideration. Four regions (8, 9, 13 and 16) were selected for analysis.

## Supplemental figure 7

A

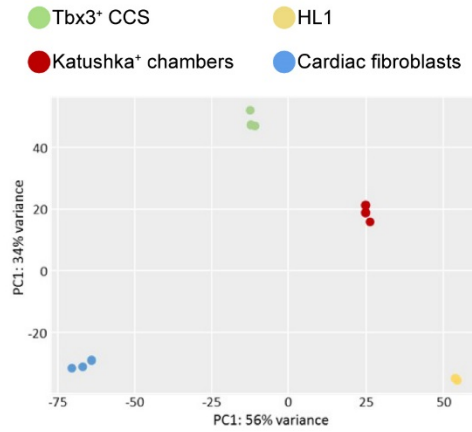

B

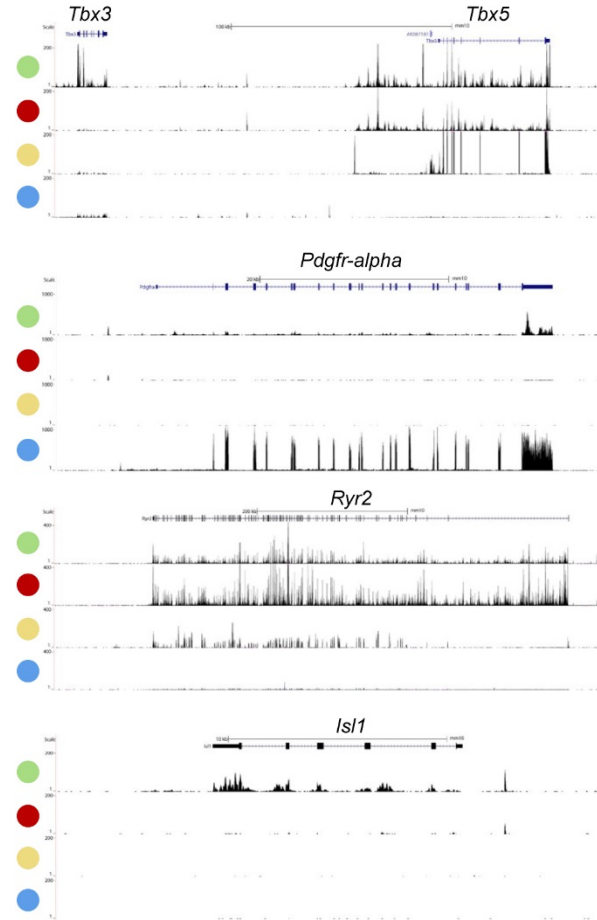

**Fig. S7. HL1 cells resemble atrial chamber cardiomyocytes and express *Tbx5* and *Ryr2*.** (A) Principal component analysis of RNA-sequencing datasets from HL1 (PRJNA380279), Tbx3<sup>+</sup> CCS cells, Katushka<sup>+</sup> chamber cells (V.W.W van Eif, S. Stefanovic, R.A. Mohan, V.M. Christoffels, submitted) and cardiac fibroblasts (PRJNA378265). (B) RNA-sequencing datasets visualized for four genomic locations that contain markers for particular cell types. *Tbx3* marks Tbx3<sup>+</sup> CCS, *Tbx5* marks cardiomyocytes, *Pdgfr-alpha* marks cardiac fibroblasts, *Ryr2* marks cardiomyocytes and is enriched in Katushka<sup>+</sup> cardiomyocytes, and *Isl1* marks Tbx3<sup>+</sup> SAN cells.

Supplemental figure 8

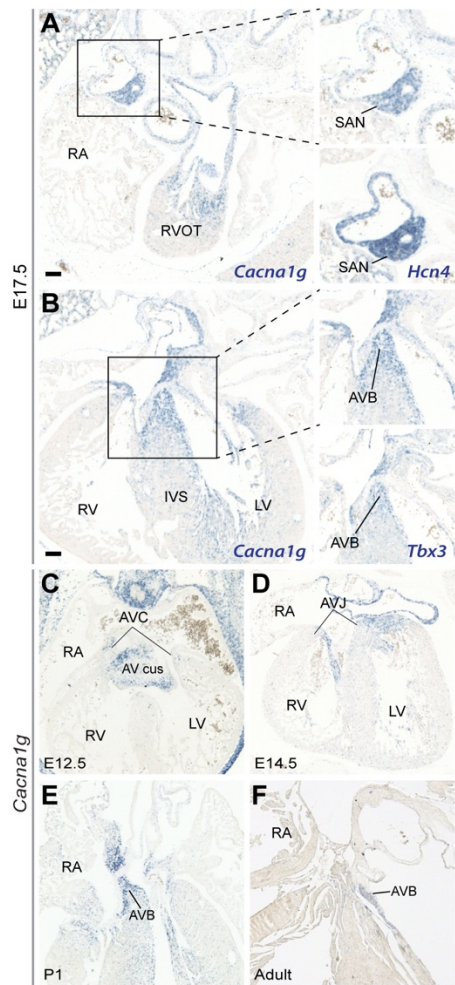

**Fig. S8. *Cacna1g* is expressed in the cardiac conduction system during development and adulthood.** (A-B) Sections of *wild-type* E17.5 mice showing *Cacna1g* in the SAN (A) and AVJ (B). Adjacent section stained for SAN marker *Hcn4* and *Tbx3*, respectively. Sections stained for *Cacna1g* showing expression in the AVC at E12.5 (C) and the AVJ at E14.5 (D). Initial broader embryonic expression is restricted to the AV conduction system postnatal (E) and expression remains similar in 2-month-old hearts (F). AVC, AV canal; AV cus, AV cushions; AVB, AV bundle; AVJ, AV junction; LA, left atrium; LV, left ventricle; RA, right atrium; RV, right ventricle; RVOT, right ventricular outflow tract; SAN, sinus node.

Supplemental figure 9

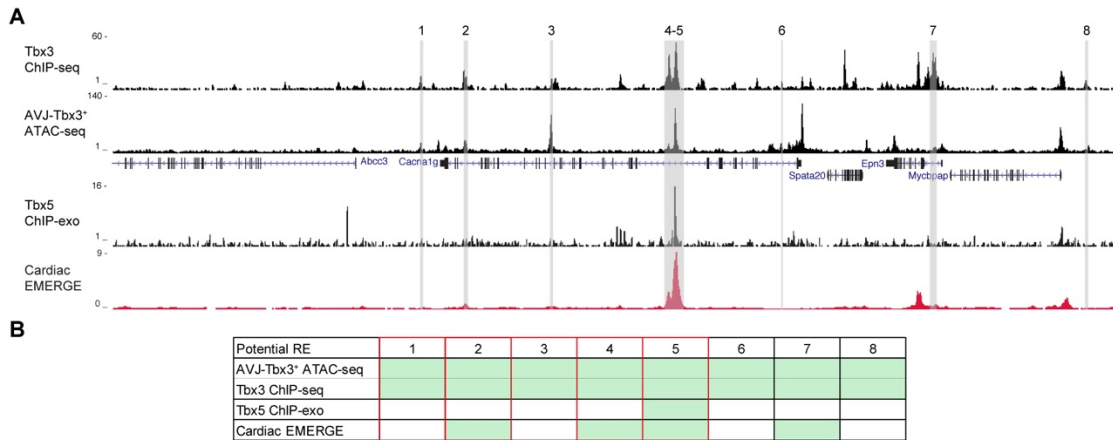

**Fig. S9. A large genomic region including *Cacna1g* scored for potential AV conduction system REs.** (A) Genomic region including *Cacna1g* is shown with Tbx3 and Tbx5 ChIP-sequencing signals, cardiac EMERGE and AV conduction system-ATAC-sequencing signals. Potential REs were selected based on accessible chromatin in the AV conduction system and at least one additional peak and are shown above. (B) After the initial screen, we continued by scoring for Tbx3 and Tbx5 occupancy and cardiac EMERGE. Signal strength of Tbx3, Tbx5 ChIP-sequencing and cardiac EMERGE were taken into consideration. Five regions (1, 2, 3, 4 and 5) were selected for analysis.



Supplemental figure 10

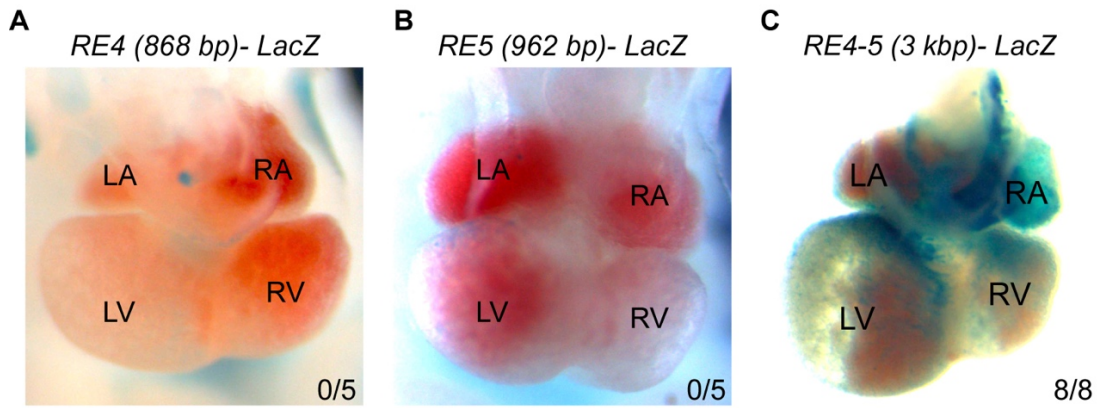

**Fig. S10. RE4 and RE5 fragments alone are not sufficient to drive expression of *LacZ*.** Whole mount images of E11.5 RE4-*LacZ* and RE5-*LacZ* transient transgenic embryos stained for  $\beta$ -gal. No transgenic embryos were positive for *LacZ* in the heart. RE4-5-*LacZ* sample shown as positive control. Abbreviations: LA, left atrium; LV, left ventricle; RA, right atrium; RV, right ventricle.



Supplemental figure 11

A

HiC

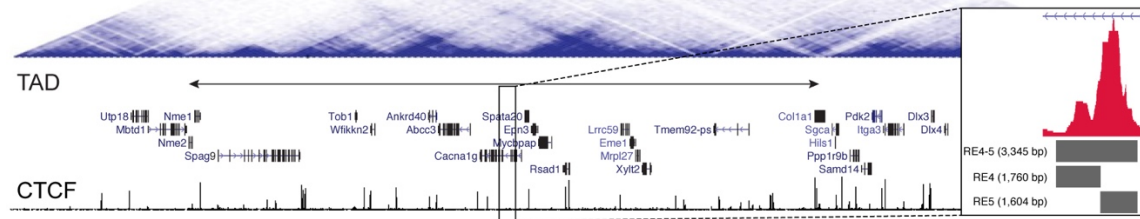

B

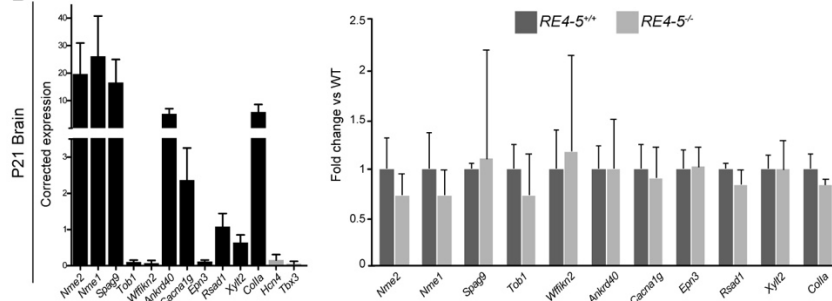

**Fig. S11. *Cacna1g* locus overview.** (A) Large region depicting all genes within the TAD that includes *Cacna1g*. Approximate TAD span was determined using available mESC HiC and CTCF ChIP datasets. CRISPR/Cas9 deletions denoted in insert. (B) Relative expression of TAD genes from P21 *wild-type* brains (n=8) determined by qPCR (Left) and fold change expression levels of TAD genes in brains from P21 *RE4-5<sup>-/-</sup>* (n=8) vs *wild-type* littermates (Right).

## Supplemental figure 12

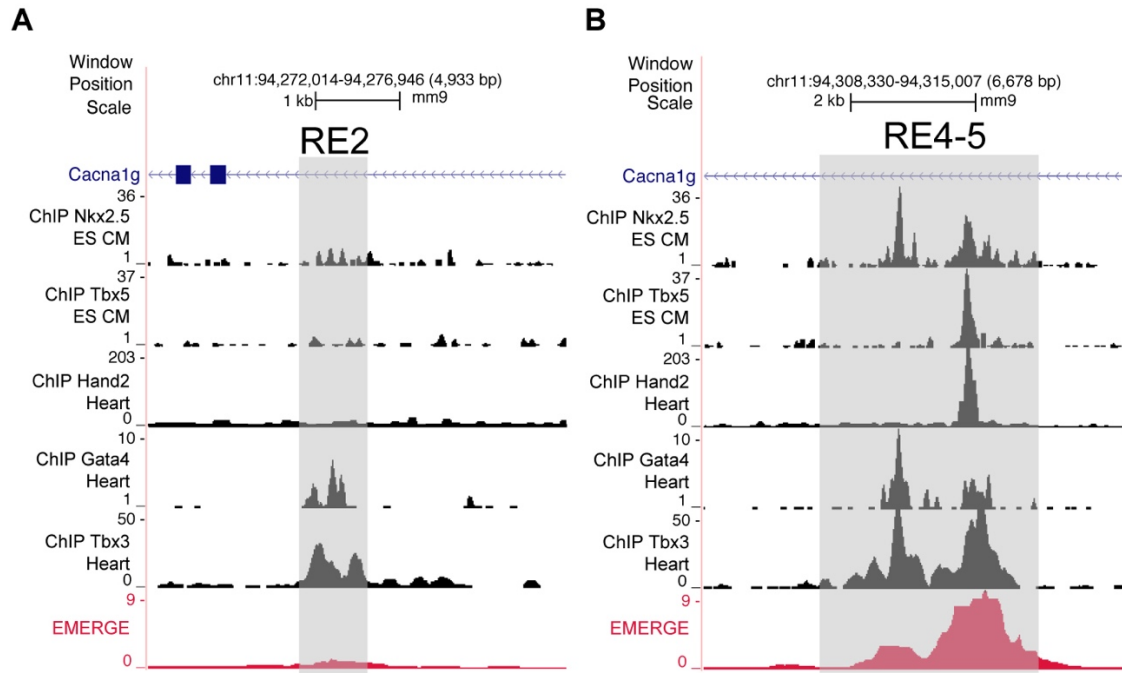

**Fig. S12. Cardiac transcription factor occupancy of RE2 and RE4-5.** UCSC browser view of RE2 (A) and RE4-5 (B) Showing Nkx2.5, Tbx5, Hand2, Gata4, and Tbx3 ChIP-seq signals, and cardiac EMERGE. Tested fragments shown in grey.

## Supplemental figure 13

**A**

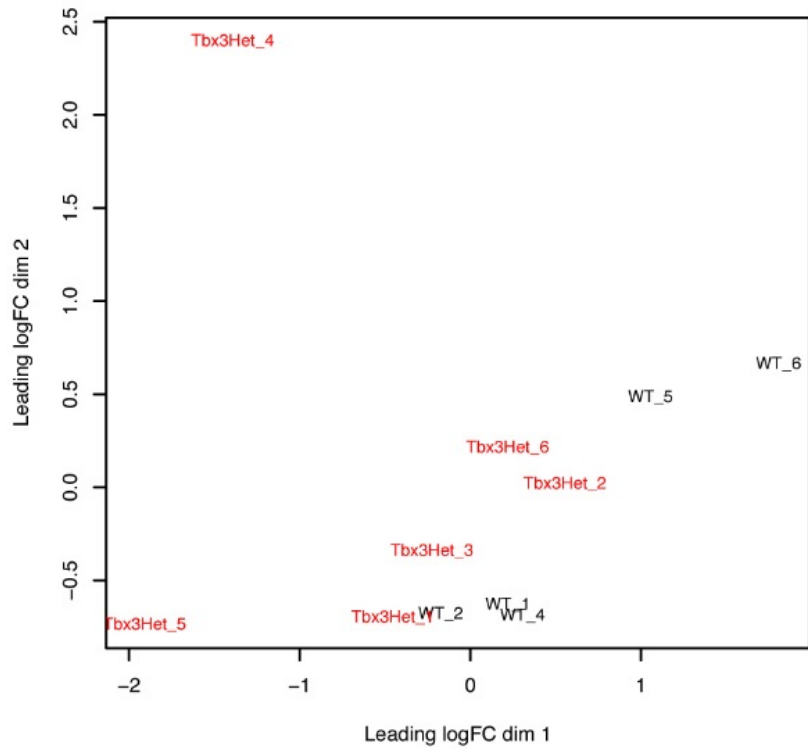

**Fig. S13. Multidimensional scaling (MDS) plot of sequenced AV nodes.** Isolated AV nodes from *wild-type* (black) and *Tbx3*<sup>+/-</sup> (red).

**Table S1. Differentially expressed genes in *Tbx3*<sup>+/-</sup> AV nodes.**

| GeneID              | Gene_symbol   | logFC        | logCPM       | F           | PValue    | FDR         |
|---------------------|---------------|--------------|--------------|-------------|-----------|-------------|
| ENSMUSG00000021313  | Ryr2          | 0.918200458  | 10.58546757  | 57.24409214 | 0.0000003 | 0.003627625 |
| ENSMUSG00000022636  | Alcam         | -1.301213188 | 7.323508362  | 32.06475938 | 0.0000162 | 0.097427043 |
| ENSMUSG000000096553 | NA            | 2.609232348  | 3.755914036  | 29.91628577 | 0.0000249 | 0.099761751 |
| ENSMUSG000000061353 | Cxcl12        | 0.968664167  | 8.360213485  | 26.65045981 | 0.0000496 | 0.141721938 |
| ENSMUSG000000087047 | NA            | 4.319910424  | 2.132199539  | 25.80445707 | 0.0000599 | 0.141721938 |
| ENSMUSG000000032338 | Hcn4          | -1.339126213 | 7.983787681  | 25.720939   | 0.0000712 | 0.141721938 |
| ENSMUSG000000097290 | 1300002E11Rik | 1.182004221  | 6.294755067  | 24.39705033 | 0.0000824 | 0.141721938 |
| ENSMUSG00000000167  | Pih1d2        | 5.179416182  | 2.365583114  | 23.69450145 | 0.0000971 | 0.145272647 |
| ENSMUSG000000030096 | Slc6a6        | 0.70180383   | 9.430838487  | 22.83686102 | 0.0001191 | 0.145272647 |
| ENSMUSG000000027611 | Procr         | 1.187958582  | 6.145607793  | 22.77938048 | 0.0001207 | 0.145272647 |
| ENSMUSG000000046743 | Fat4          | -0.649267918 | 8.381687777  | 20.38402812 | 0.0002187 | 0.221307323 |
| ENSMUSG000000036138 | Acaa1a        | 2.179888296  | 3.899852878  | 20.34852155 | 0.0002207 | 0.221307323 |
| ENSMUSG000000043004 | Gng2          | -2.125359266 | 3.710807789  | 18.99670055 | 0.0003140 | 0.290681429 |
| ENSMUSG000000010066 | Cacna2d2      | -1.014179208 | 10.21941134  | 18.82874003 | 0.0003876 | 0.291647139 |
| ENSMUSG000000052675 | Zfp112        | 2.940037224  | 2.861222964  | 18.20130191 | 0.0003889 | 0.291647139 |
| ENSMUSG000000029309 | Sparcl1       | 0.816251122  | 9.855855316  | 17.78869757 | 0.0004354 | 0.291647139 |
| ENSMUSG000000032218 | Ccnb2         | -2.540603011 | 4.696101677  | 18.28818156 | 0.0004520 | 0.291647139 |
| ENSMUSG000000018411 | Mapt          | 1.570863778  | 5.094835791  | 17.60529607 | 0.0004580 | 0.291647139 |
| ENSMUSG000000044337 | Ackr3         | 1.716137736  | 5.037627461  | 17.51533396 | 0.0004695 | 0.291647139 |
| ENSMUSG000000038349 | Plcl1         | -1.032662119 | 5.354859883  | 17.39833419 | 0.0004850 | 0.291647139 |
| ENSMUSG000000039254 | Pomt1         | 1.967472553  | 3.86281185   | 17.10519992 | 0.0005264 | 0.291647139 |
| ENSMUSG000000054966 | Ifltd1        | -0.97439903  | 6.170611509  | 16.98372854 | 0.0005447 | 0.291647139 |
| ENSMUSG000000039639 | Kcne1         | 0.764467753  | 7.687476142  | 16.66196719 | 0.0005967 | 0.291647139 |
| ENSMUSG000000031409 | Tceal6        | -3.711618553 | 1.083355669  | 16.62974337 | 0.0006022 | 0.291647139 |
| ENSMUSG000000032036 | Kirrel3       | -1.1423029   | 5.997667825  | 16.60781133 | 0.0006059 | 0.291647139 |
| ENSMUSG000000052369 | Tmem106c      | -2.055509657 | 2.813282991  | 16.3532132  | 0.0006517 | 0.294462989 |
| ENSMUSG000000070867 | Trabd2b       | 1.299553215  | 6.275415161  | 16.05009769 | 0.0007112 | 0.294462989 |
| ENSMUSG000000033965 | Slc16a2       | -0.955515969 | 6.089700189  | 16.00718482 | 0.0007202 | 0.294462989 |
| ENSMUSG000000091177 | NA            | 5.225928403  | 0.022035146  | 15.94933252 | 0.0007324 | 0.294462989 |
| ENSMUSG000000026939 | Tmem141       | -3.544197972 | 1.32348091   | 15.91137466 | 0.0007405 | 0.294462989 |
| ENSMUSG000000023235 | Ccl25         | 2.953251359  | 2.617005464  | 15.7278268  | 0.0007812 | 0.294462989 |
| ENSMUSG000000088843 | NA            | 7.445344141  | 0.767935127  | 17.21817975 | 0.0007831 | 0.294462989 |
| ENSMUSG000000029386 | Tctn2         | 2.682302822  | 2.678919926  | 15.40422718 | 0.0008593 | 0.312081182 |
| ENSMUSG000000091881 | NA            | 3.64736946   | 1.933818128  | 15.21324788 | 0.0009093 | 0.312081182 |
| ENSMUSG00000009555  | Cdk9          | 2.154748721  | 3.497535517  | 14.96171226 | 0.0009803 | 0.312081182 |
| ENSMUSG000000024392 | Bag6          | -0.663612204 | 6.806076479  | 14.92400102 | 0.0009915 | 0.312081182 |
| ENSMUSG000000026648 | Dclre1c       | 1.279927182  | 4.718006848  | 14.86313617 | 0.0010098 | 0.312081182 |
| ENSMUSG000000027792 | Bche          | -0.846635856 | 6.667071832  | 14.80683953 | 0.0010270 | 0.312081182 |
| ENSMUSG000000040740 | Slc25a34      | 2.935418421  | 3.189261089  | 14.7734345  | 0.0010374 | 0.312081182 |
| ENSMUSG000000002831 | Plin4         | 1.664946074  | 4.896514406  | 14.73300913 | 0.0010502 | 0.312081182 |
| ENSMUSG000000069516 | Lyz2          | -1.372992117 | 5.539255359  | 14.69148926 | 0.0010634 | 0.312081182 |
| ENSMUSG000000074968 | Ano3          | -0.986783108 | 5.415279033  | 14.61216566 | 0.0010893 | 0.312081182 |
| ENSMUSG000000079481 | Nhsl2         | -0.611029145 | 7.996850272  | 14.41384499 | 0.0011570 | 0.318074784 |
| ENSMUSG000000019278 | Dpep1         | 1.556694067  | 5.32930278   | 14.36353725 | 0.0011750 | 0.318074784 |
| ENSMUSG000000022231 | Sema5a        | -0.679289166 | 8.421785588  | 14.32333613 | 0.0011895 | 0.318074784 |
| ENSMUSG000000022033 | Pbk           | -2.591871384 | 2.258791598  | 14.10095222 | 0.0012736 | 0.326683491 |
| ENSMUSG000000087384 | NA            | 2.246696222  | 3.057345747  | 14.04187589 | 0.0012971 | 0.326683491 |
| ENSMUSG000000098221 | NA            | 5.028658057  | -0.085146801 | 14.02678449 | 0.0013032 | 0.326683491 |
| ENSMUSG000000024812 | Tjp2          | -0.927648987 | 6.026462302  | 13.86932461 | 0.0013683 | 0.336025443 |
| ENSMUSG000000039542 | Ncam1         | -0.699168362 | 6.897717399  | 13.37791875 | 0.0015962 | 0.347405818 |
| ENSMUSG000000022893 | Adamts1       | -0.872239957 | 5.890552107  | 13.35780521 | 0.0016064 | 0.347405818 |
| ENSMUSG000000042626 | Shc1          | -1.037797384 | 5.072967331  | 13.28962269 | 0.0016414 | 0.347405818 |
| ENSMUSG000000027936 | Crtc2         | 0.910445251  | 5.468490415  | 13.25010936 | 0.0016621 | 0.347405818 |
| ENSMUSG000000031461 | Myom2         | 1.32971336   | 6.756555082  | 13.80281073 | 0.0016808 | 0.347405818 |

|                    |               |              |              |             |           |             |
|--------------------|---------------|--------------|--------------|-------------|-----------|-------------|
| ENSMUSG00000021719 | Rgs7bp        | -1.0957247   | 4.72314627   | 13.21215126 | 0.0016823 | 0.347405818 |
| ENSMUSG00000055567 | Unc80         | -0.701735983 | 8.036631724  | 13.19754838 | 0.0016901 | 0.347405818 |
| ENSMUSG00000024271 | Elp2          | 0.940133435  | 5.359650364  | 13.1974256  | 0.0016902 | 0.347405818 |
| ENSMUSG00000000318 | Clec10a       | 4.52897292   | 1.233742001  | 13.17110673 | 0.0017044 | 0.347405818 |
| ENSMUSG00000033917 | Gde1          | -1.325479063 | 4.475214725  | 13.10775975 | 0.0017391 | 0.347405818 |
| ENSMUSG00000037071 | Scd1          | 1.819563952  | 3.787820199  | 13.10171615 | 0.0017425 | 0.347405818 |
| ENSMUSG00000082503 | NA            | 3.753088206  | 1.713393276  | 13.06839482 | 0.0017611 | 0.347405818 |
| ENSMUSG00000027238 | Frmf5         | 0.769702357  | 6.771671843  | 12.93633228 | 0.0018372 | 0.356564206 |
| ENSMUSG00000074207 | Adh1          | 4.651705175  | 1.962719301  | 12.86402189 | 0.0019122 | 0.365224189 |
| ENSMUSG00000021327 | Zkscan3       | 0.703274749  | 6.47620393   | 12.75560845 | 0.0019472 | 0.366113292 |
| ENSMUSG00000026100 | Mstn          | -1.918323372 | 3.164433373  | 12.58759013 | 0.0020562 | 0.380641527 |
| ENSMUSG00000027510 | Rbm38         | -0.793228097 | 6.139007036  | 12.51286262 | 0.0021067 | 0.38409814  |
| ENSMUSG00000084545 | NA            | 5.010453249  | -0.034663164 | 12.39162558 | 0.0021918 | 0.388886564 |
| ENSMUSG00000018012 | Rac3          | 4.115900666  | 0.89263587   | 12.25996902 | 0.0022885 | 0.388886564 |
| ENSMUSG00000020250 | Txnrd1        | 1.604501423  | 3.929937782  | 12.25718449 | 0.0022906 | 0.388886564 |
| ENSMUSG0000003934  | Efnb3         | 1.309290569  | 4.623635404  | 12.22714244 | 0.0023133 | 0.388886564 |
| ENSMUSG00000034813 | Grip1         | -1.195869637 | 5.834128474  | 12.21094847 | 0.0023257 | 0.388886564 |
| ENSMUSG00000049313 | Sorl1         | -0.575665441 | 8.326136468  | 12.19994055 | 0.0023341 | 0.388886564 |
| ENSMUSG00000037519 | Ppfia1        | 0.541268223  | 7.487216176  | 12.14281514 | 0.0023785 | 0.388886564 |
| ENSMUSG00000041361 | Myzap         | 0.898807656  | 7.027707976  | 12.10272841 | 0.0024102 | 0.388886564 |
| ENSMUSG00000029660 | Tex26         | -3.663109412 | 1.039650808  | 12.0539139  | 0.0024495 | 0.388886564 |
| ENSMUSG00000031530 | Dusp4         | 2.322332916  | 2.571047102  | 12.01076287 | 0.0024847 | 0.388886564 |
| ENSMUSG00000044086 | Lmod3         | 2.0228267    | 5.505763191  | 12.9149745  | 0.0024885 | 0.388886564 |
| ENSMUSG00000051396 | Hspa14        | 1.42284068   | 4.842380797  | 11.9489292  | 0.0025363 | 0.389639757 |
| ENSMUSG0000003848  | Nob1          | 2.065119215  | 3.428636267  | 11.90818835 | 0.0025709 | 0.389639757 |
| ENSMUSG00000019124 | Scrn1         | -0.7073401   | 6.691383656  | 11.84928861 | 0.0026218 | 0.389639757 |
| ENSMUSG00000047867 | Gimap6        | -1.362179271 | 3.657759785  | 11.81507425 | 0.0026519 | 0.389639757 |
| ENSMUSG00000031066 | Usp11         | -0.987390615 | 5.743937591  | 11.78614177 | 0.0026777 | 0.389639757 |
| ENSMUSG00000026443 | Lrrn2         | -1.058719119 | 5.50171726   | 11.77510237 | 0.0026876 | 0.389639757 |
| ENSMUSG00000050511 | Oprd1         | -1.447402404 | 5.175380603  | 11.49191673 | 0.0029561 | 0.423465424 |
| ENSMUSG00000030220 | Arhgdib       | 1.634134832  | 4.592830126  | 11.33578688 | 0.0031168 | 0.429716783 |
| ENSMUSG00000031748 | Gnao1         | -0.548293048 | 9.23358799   | 11.28253219 | 0.0031738 | 0.429716783 |
| ENSMUSG00000070100 | NA            | 6.210654325  | -0.3064858   | 12.09875924 | 0.0031794 | 0.429716783 |
| ENSMUSG00000014846 | Tppp3         | -1.11011789  | 5.115765164  | 11.23702721 | 0.0032235 | 0.429716783 |
| ENSMUSG00000047414 | Flrt2         | -0.688630089 | 6.592382824  | 11.1819273  | 0.0032847 | 0.429716783 |
| ENSMUSG00000033396 | NA            | 0.902381657  | 5.788912149  | 11.16366925 | 0.0033053 | 0.429716783 |
| ENSMUSG00000086328 | NA            | -3.670104752 | 1.288437295  | 11.14650182 | 0.0033248 | 0.429716783 |
| ENSMUSG00000042557 | Sin3a         | -0.557161538 | 7.371786458  | 11.14258132 | 0.0033292 | 0.429716783 |
| ENSMUSG00000031561 | Tenm3         | -0.618584104 | 7.020962609  | 11.14114664 | 0.0033309 | 0.429716783 |
| ENSMUSG00000073388 | NA            | 3.423091333  | 2.37349316   | 11.11845    | 0.0033569 | 0.429716783 |
| ENSMUSG00000041809 | Efhc1         | 2.196094381  | 1.884015867  | 11.00309526 | 0.0034926 | 0.434634411 |
| ENSMUSG00000048458 | Fam212b       | 0.695062015  | 6.560405343  | 10.98236925 | 0.0035176 | 0.434634411 |
| ENSMUSG00000032803 | Cdv3          | 0.966174652  | 5.092646775  | 10.96800595 | 0.0035351 | 0.434634411 |
| ENSMUSG00000098732 | NA            | 5.697567932  | -0.557380659 | 11.72999096 | 0.0035556 | 0.434634411 |
| ENSMUSG00000090088 | LOC102638854  | 3.005630822  | 0.236886281  | 10.92278095 | 0.0035907 | 0.434634411 |
| ENSMUSG00000098110 | NA            | 2.59261048   | 1.24226803   | 10.76809655 | 0.0037883 | 0.434634411 |
| ENSMUSG00000020888 | Dvl2          | 2.293694213  | 3.176894201  | 10.75250424 | 0.0038089 | 0.434634411 |
| ENSMUSG00000039899 | Fgl2          | -0.603161126 | 6.793964917  | 10.7233003  | 0.0038478 | 0.434634411 |
| ENSMUSG00000032340 | Neo1          | -0.434312954 | 8.645488409  | 10.70729952 | 0.0038693 | 0.434634411 |
| ENSMUSG00000074748 | Atxn7l3b      | -0.65228592  | 7.493143177  | 10.68744279 | 0.0038962 | 0.434634411 |
| ENSMUSG00000036242 | 3632451O06Rik | -1.040236147 | 5.667552029  | 10.65434606 | 0.0039414 | 0.434634411 |
| ENSMUSG00000018822 | Sfrp5         | -1.322544087 | 3.975181523  | 10.62371231 | 0.0039838 | 0.434634411 |
| ENSMUSG00000038195 | Rilp          | 1.38099289   | 3.441960572  | 10.62109569 | 0.0039874 | 0.434634411 |
| ENSMUSG00000038665 | Dgki          | -1.827496303 | 3.183115367  | 10.61022716 | 0.0040026 | 0.434634411 |
| ENSMUSG00000045875 | Adra1a        | -1.647494661 | 3.930662814  | 10.55840907 | 0.0040758 | 0.434634411 |

|                    |               |              |              |             |           |             |
|--------------------|---------------|--------------|--------------|-------------|-----------|-------------|
| ENSMUSG00000017897 | Eya2          | 2.807754117  | 1.966304393  | 10.54295388 | 0.0040980 | 0.434634411 |
| ENSMUSG00000029765 | Plxna4        | -0.536005504 | 8.655425354  | 10.52379432 | 0.0041256 | 0.434634411 |
| ENSMUSG00000044224 | Dnajc21       | 0.715069223  | 6.66074908   | 10.51312433 | 0.0041411 | 0.434634411 |
| ENSMUSG00000074652 | Myh7b         | 0.785814086  | 7.026450148  | 10.50699732 | 0.0041500 | 0.434634411 |
| ENSMUSG00000032014 | Oaf           | 2.54247982   | 2.490467599  | 10.5022126  | 0.0041570 | 0.434634411 |
| ENSMUSG00000032640 | Chsy1         | -0.584050199 | 7.204926012  | 10.49585685 | 0.0041663 | 0.434634411 |
| ENSMUSG00000030380 | Mzf1          | 2.316840193  | 2.365278271  | 10.47474789 | 0.0041973 | 0.434634411 |
| ENSMUSG00000032000 | Birc3         | 1.304838696  | 4.072594026  | 10.45529804 | 0.0042261 | 0.434634411 |
| ENSMUSG00000023150 | lvns1abp      | 0.545912925  | 8.642477404  | 10.34003667 | 0.0044013 | 0.448821481 |
| ENSMUSG00000035232 | Pdk3          | -1.579825062 | 3.475355068  | 10.28300109 | 0.0044910 | 0.449340392 |
| ENSMUSG00000097042 | NA            | 1.954306547  | 3.779790724  | 10.2278158  | 0.0045797 | 0.449340392 |
| ENSMUSG00000032293 | Ireb2         | -0.628436679 | 6.574527632  | 10.19700333 | 0.0046301 | 0.449340392 |
| ENSMUSG00000038319 | Kcnh2         | -0.610162064 | 7.296756508  | 10.19527222 | 0.0046330 | 0.449340392 |
| ENSMUSG00000027933 | Ints3         | 0.967372912  | 5.610092339  | 10.15135478 | 0.0047059 | 0.449340392 |
| ENSMUSG00000040896 | Kcnd3         | 1.405659105  | 3.653208869  | 10.14633441 | 0.0047143 | 0.449340392 |
| ENSMUSG00000029703 | Lrwd1         | 2.218948667  | 2.143420121  | 10.12592318 | 0.0047487 | 0.449340392 |
| ENSMUSG00000018263 | Tbx5          | -0.539343099 | 9.96307087   | 10.09997955 | 0.0047928 | 0.449340392 |
| ENSMUSG00000025417 | Pip4k2c       | -0.806302664 | 6.162154426  | 10.06857862 | 0.0048469 | 0.449340392 |
| ENSMUSG00000051235 | Gen1          | -1.81185541  | 2.83588693   | 10.06362975 | 0.0048554 | 0.449340392 |
| ENSMUSG00000033900 | Map9          | -0.789997538 | 5.555933296  | 10.01450259 | 0.0049415 | 0.449340392 |
| ENSMUSG00000024871 | Doc2g         | 1.990585281  | 2.918489771  | 9.994218496 | 0.0049775 | 0.449340392 |
| ENSMUSG00000024854 | Polld4        | 3.283700101  | 1.501084265  | 9.992577603 | 0.0049804 | 0.449340392 |
| ENSMUSG00000034981 | Parm1         | -0.529703412 | 8.958513075  | 9.97643866  | 0.0050093 | 0.449340392 |
| ENSMUSG00000053414 | Hunk          | -1.098605791 | 4.401445796  | 9.936995174 | 0.0050807 | 0.449340392 |
| ENSMUSG00000062591 | Tubb4a        | -1.009300131 | 6.698972504  | 10.0582258  | 0.0050987 | 0.449340392 |
| ENSMUSG00000038127 | Ccdc50        | -0.548113784 | 6.921681097  | 9.922599117 | 0.0051070 | 0.449340392 |
| ENSMUSG00000042302 | Ehbp1         | 0.539853259  | 7.588951949  | 9.918024471 | 0.0051154 | 0.449340392 |
| ENSMUSG00000028683 | Eif2b3        | 1.480637098  | 3.657907051  | 9.899997341 | 0.0051487 | 0.449340392 |
| ENSMUSG00000031712 | Ii15          | -1.268400003 | 3.71695009   | 9.897546181 | 0.0051532 | 0.449340392 |
| ENSMUSG00000074916 | Chst14        | 1.681575882  | 3.550149589  | 9.807696994 | 0.0053228 | 0.460785108 |
| ENSMUSG00000021730 | Hcn1          | -0.732488896 | 7.712369785  | 9.746697057 | 0.0054414 | 0.461401017 |
| ENSMUSG00000030417 | NA            | 1.131994363  | 4.773072259  | 9.743298959 | 0.0054481 | 0.461401017 |
| ENSMUSG00000061894 | Zscan20       | -1.402414968 | 4.156595816  | 9.730614632 | 0.0054732 | 0.461401017 |
| ENSMUSG00000024959 | Bad           | 1.857963878  | 2.533119885  | 9.72553289  | 0.0054833 | 0.461401017 |
| ENSMUSG00000021268 | Meg3          | 0.783497966  | 8.240262433  | 9.752925922 | 0.0055588 | 0.462500365 |
| ENSMUSG00000030869 | Ndufab1       | 0.96431466   | 4.791207542  | 9.680652079 | 0.0055732 | 0.462500365 |
| ENSMUSG00000038059 | Smim3         | 2.663101983  | 1.372436436  | 9.658738722 | 0.0056177 | 0.463000793 |
| ENSMUSG00000065544 | NA            | 4.149180666  | -0.230810427 | 9.629961992 | 0.0056768 | 0.464684798 |
| ENSMUSG00000032840 | 2410131K14Rik | 1.201648135  | 4.935655518  | 9.58116535  | 0.0057785 | 0.469771153 |
| ENSMUSG00000069678 | Pcgf1         | -2.4093399   | 2.655378416  | 9.562695198 | 0.0058175 | 0.469771153 |
| ENSMUSG00000041439 | Mfsd6         | -0.539765331 | 8.406744899  | 9.544604919 | 0.0058560 | 0.469771153 |
| ENSMUSG00000026641 | Usf1          | 2.089820626  | 1.709879889  | 9.503116459 | 0.0059454 | 0.470866954 |
| ENSMUSG00000038151 | Prdm1         | 1.50858887   | 3.836782529  | 9.486392993 | 0.0059819 | 0.470866954 |
| ENSMUSG00000018339 | Gpx3          | -0.44731424  | 10.11736075  | 9.484021756 | 0.0059871 | 0.470866954 |
| ENSMUSG00000023206 | Ii15ra        | 1.034038721  | 5.284507353  | 9.462850994 | 0.0060337 | 0.471005235 |
| ENSMUSG00000050410 | Tcf19         | -1.985072864 | 3.161882916  | 9.444780502 | 0.0060737 | 0.471005235 |
| ENSMUSG00000036510 | Cdh8          | -2.079121772 | 3.469239472  | 9.43019317  | 0.0061063 | 0.471005235 |
| ENSMUSG00000054008 | Ndst1         | -0.591705947 | 6.735044548  | 9.400586871 | 0.0061730 | 0.472944269 |
| ENSMUSG00000025316 | Banp          | 1.167844783  | 4.509873131  | 9.381623412 | 0.0062161 | 0.472944269 |
| ENSMUSG00000037996 | Slc24a2       | -0.468114311 | 8.289329905  | 9.367111428 | 0.0062493 | 0.472944269 |
| ENSMUSG00000031393 | Mecp2         | -0.436406911 | 7.978615059  | 9.30805223  | 0.0063866 | 0.474815458 |
| ENSMUSG00000033389 | Arhgap44      | -0.786008516 | 5.815888683  | 9.273386852 | 0.0064688 | 0.474815458 |
| ENSMUSG00000063108 | Zfp26         | -0.689636805 | 6.123048863  | 9.267030535 | 0.0064840 | 0.474815458 |
| ENSMUSG00000010663 | Fads1         | -0.663946929 | 5.931841507  | 9.231987188 | 0.0065685 | 0.474815458 |
| ENSMUSG00000028405 | Aco1          | 1.060554822  | 5.107469304  | 9.231419923 | 0.0065699 | 0.474815458 |



|                     |               |              |              |             |           |             |
|---------------------|---------------|--------------|--------------|-------------|-----------|-------------|
| ENSMUSG00000074646  | 6430550D23Rik | 3.207702163  | 1.910115111  | 9.210246041 | 0.0066215 | 0.474815458 |
| ENSMUSG00000001768  | Rin2          | -0.735420424 | 6.071926996  | 9.191271291 | 0.0066682 | 0.474815458 |
| ENSMUSG000000033436 | Armcx2        | -0.795699423 | 5.487789075  | 9.179139975 | 0.0066982 | 0.474815458 |
| ENSMUSG000000093904 | Tom20         | -0.964197279 | 5.290000251  | 9.157662517 | 0.0067517 | 0.474815458 |
| ENSMUSG000000038205 | Prkab2        | 0.733150326  | 5.700910295  | 9.154712173 | 0.0067591 | 0.474815458 |
| ENSMUSG000000034111 | Tmed8         | -0.828375416 | 5.281415217  | 9.149042907 | 0.0067734 | 0.474815458 |
| ENSMUSG000000073002 | Vamp5         | 1.335449449  | 3.955630176  | 9.14669938  | 0.0067793 | 0.474815458 |
| ENSMUSG000000044667 | Lppr4         | -1.318455827 | 5.144684802  | 9.143613067 | 0.0067870 | 0.474815458 |
| ENSMUSG000000081219 | NA            | 3.76693088   | 0.071052827  | 9.090447151 | 0.0069224 | 0.480930769 |
| ENSMUSG000000001525 | Tubb5         | -0.561060996 | 7.580143386  | 9.074327285 | 0.0069640 | 0.480930769 |
| ENSMUSG000000027765 | P2ry1         | 1.891157758  | 2.457252819  | 9.059973298 | 0.0070013 | 0.480930769 |
| ENSMUSG000000028820 | Sfpq          | 0.461145108  | 7.777709149  | 9.047363474 | 0.0070343 | 0.480930769 |
| ENSMUSG000000037243 | Zfp692        | 2.40174059   | 2.95978655   | 8.999058272 | 0.0071622 | 0.48690714  |
| ENSMUSG000000067276 | Capn6         | -0.804400238 | 5.362012285  | 8.967340347 | 0.0072476 | 0.488211138 |
| ENSMUSG000000027668 | Mfn1          | 0.551059279  | 7.123827452  | 8.943824789 | 0.0073116 | 0.488211138 |
| ENSMUSG000000005373 | Mlxip1        | 1.784302776  | 2.878808729  | 8.933479068 | 0.0073400 | 0.488211138 |
| ENSMUSG000000042208 | 0610010F05Rik | 0.896778868  | 4.990651215  | 8.923067412 | 0.0073686 | 0.488211138 |
| ENSMUSG000000022790 | Igsf11        | 2.32270508   | 2.963770016  | 8.913030361 | 0.0073964 | 0.488211138 |
| ENSMUSG000000026027 | Stradb        | 0.982449595  | 4.377633801  | 8.882242882 | 0.0074823 | 0.488211138 |
| ENSMUSG000000092565 | NA            | 3.724927209  | 0.954092171  | 8.871352218 | 0.0075129 | 0.488211138 |
| ENSMUSG000000001943 | Vsig2         | 2.14419812   | 1.048701606  | 8.866427685 | 0.0075268 | 0.488211138 |
| ENSMUSG000000050315 | Synpo2        | -0.531137703 | 8.060845614  | 8.85946873  | 0.0075465 | 0.488211138 |
| ENSMUSG000000094650 | NA            | 4.057610535  | -0.779291778 | 8.831650501 | 0.0076258 | 0.490703779 |
| ENSMUSG000000020260 | Pofut2        | -0.738068174 | 5.216990439  | 8.796513701 | 0.0077273 | 0.49078679  |
| ENSMUSG000000057880 | Abat          | -0.800951601 | 5.245624012  | 8.795486008 | 0.0077303 | 0.49078679  |
| ENSMUSG000000063576 | Klhdc3        | -0.830413071 | 4.990858594  | 8.788149754 | 0.0077517 | 0.49078679  |
| ENSMUSG000000073557 | Ppp1r12b      | -0.474737531 | 8.727053882  | 8.774987693 | 0.0077903 | 0.49078679  |
| ENSMUSG000000029093 | Sorcs2        | -1.286406807 | 4.321926095  | 8.686239861 | 0.0080558 | 0.504400106 |
| ENSMUSG000000035623 | Rsf1          | -0.540759969 | 7.941725911  | 8.665297752 | 0.0081199 | 0.504400106 |
| ENSMUSG000000026163 | Sphkap        | -0.707399202 | 6.686738387  | 8.661348775 | 0.0081321 | 0.504400106 |
| ENSMUSG000000013846 | St3gal1       | -0.522139797 | 6.569915902  | 8.586011979 | 0.0083679 | 0.508942401 |
| ENSMUSG000000038256 | Bcl9          | -0.545595387 | 8.054506741  | 8.580840831 | 0.0083844 | 0.508942401 |
| ENSMUSG000000032511 | Scn5a         | 1.100930559  | 5.58612603   | 8.575515303 | 0.0084014 | 0.508942401 |
| ENSMUSG000000021994 | Wnt5a         | -1.298198225 | 4.771966054  | 8.573791749 | 0.0084069 | 0.508942401 |
| ENSMUSG000000035105 | Egln3         | -0.620290144 | 7.01359267   | 8.536871666 | 0.0085259 | 0.508942401 |
| ENSMUSG000000060187 | Lrrc10        | 1.442710579  | 3.561259662  | 8.52627051  | 0.0085604 | 0.508942401 |
| ENSMUSG000000040659 | Efh2          | -0.519333778 | 6.947545842  | 8.524551222 | 0.0085660 | 0.508942401 |
| ENSMUSG000000100398 | NA            | -2.966983034 | -0.33371935  | 8.520196393 | 0.0085802 | 0.508942401 |
| ENSMUSG000000086292 | NA            | 3.498396912  | 0.671707036  | 8.518433643 | 0.0085860 | 0.508942401 |
| ENSMUSG000000031730 | Dhodh         | 1.560211805  | 3.561143968  | 8.504076665 | 0.0086331 | 0.509228043 |
| ENSMUSG000000068079 | Tcf15         | 1.59305177   | 2.611800329  | 8.454696415 | 0.0087975 | 0.512718742 |
| ENSMUSG000000073753 | NA            | 3.269681992  | 1.843172793  | 8.447745658 | 0.0088209 | 0.512718742 |
| ENSMUSG000000024430 | Cabyr         | 1.838585256  | 2.791962666  | 8.445193466 | 0.0088295 | 0.512718742 |
| ENSMUSG000000027254 | Map1a         | -0.40840188  | 8.974690398  | 8.43537084  | 0.0088628 | 0.512718742 |
| ENSMUSG000000020891 | Alox8         | -0.544425919 | 8.271543651  | 8.39507532  | 0.0090006 | 0.513088245 |
| ENSMUSG000000064202 | 4430402I18Rik | -1.064473763 | 5.156187329  | 8.387346554 | 0.0090273 | 0.513088245 |
| ENSMUSG000000001334 | Fndc5         | 1.699558059  | 3.869939239  | 8.384889447 | 0.0090358 | 0.513088245 |
| ENSMUSG000000025489 | Ifitm5        | 3.897890142  | 0.514589525  | 8.381848457 | 0.0090464 | 0.513088245 |
| ENSMUSG000000099843 | NA            | -2.674702031 | 1.920594063  | 8.34915551  | 0.0091606 | 0.513088245 |
| ENSMUSG000000018340 | Anxa6         | -0.451737448 | 7.466063225  | 8.346625515 | 0.0091695 | 0.513088245 |
| ENSMUSG000000097242 | Gm16907       | 1.08964398   | 4.388252803  | 8.345470687 | 0.0091736 | 0.513088245 |
| ENSMUSG000000022656 | Pvrl3         | -0.58012691  | 6.780125137  | 8.334783574 | 0.0092113 | 0.513088245 |
| ENSMUSG000000027956 | Tmem144       | 0.981660399  | 4.591557586  | 8.323067235 | 0.0092529 | 0.513088245 |
| ENSMUSG000000024613 | Tcof1         | -0.863517712 | 4.851097747  | 8.293394416 | 0.0093592 | 0.514939156 |
| ENSMUSG000000042514 | Klhl14        | -1.479747329 | 3.30346675   | 8.289871795 | 0.0093719 | 0.514939156 |

|                    |               |              |              |             |           |             |
|--------------------|---------------|--------------|--------------|-------------|-----------|-------------|
| ENSMUSG00000032667 | Pon2          | 0.975248288  | 5.901621972  | 8.277786645 | 0.0094156 | 0.514990595 |
| ENSMUSG00000020009 | lfngr1        | 0.851909734  | 5.117126171  | 8.254786059 | 0.0094995 | 0.515927261 |
| ENSMUSG00000037148 | Arhgap10      | -0.590480634 | 6.295108289  | 8.244130105 | 0.0095386 | 0.515927261 |
| ENSMUSG00000064390 | NA            | 5.040944917  | -0.994985928 | 8.68886437  | 0.0096079 | 0.515927261 |
| ENSMUSG00000033342 | Lppr5         | -1.236635163 | 4.794772686  | 8.202872138 | 0.0096918 | 0.515927261 |
| ENSMUSG00000040752 | Myh6          | 0.417447384  | 14.03296203  | 8.180449437 | 0.0097763 | 0.515927261 |
| ENSMUSG00000046179 | E2f8          | -1.385658187 | 4.503983676  | 8.178581422 | 0.0097834 | 0.515927261 |
| ENSMUSG00000083000 | NA            | 2.883850391  | 1.922767378  | 8.145596132 | 0.0099092 | 0.515927261 |
| ENSMUSG00000040037 | Negr1         | -0.912250263 | 4.87162146   | 8.140995174 | 0.0099268 | 0.515927261 |
| ENSMUSG00000038022 | Fam188b       | 1.740320462  | 2.529455728  | 8.135286792 | 0.0099488 | 0.515927261 |
| ENSMUSG00000064366 | NA            | 2.153931283  | 3.982821683  | 8.282532597 | 0.0099937 | 0.515927261 |
| ENSMUSG00000025781 | Atp5c1        | 0.463632877  | 7.03573502   | 8.122290065 | 0.0099991 | 0.515927261 |
| ENSMUSG00000086465 | NA            | 3.846334968  | -0.36284859  | 8.104679864 | 0.0100677 | 0.515927261 |
| ENSMUSG00000019818 | Cd164         | -0.420028686 | 7.997652133  | 8.077991559 | 0.0101727 | 0.515927261 |
| ENSMUSG00000086953 | NA            | 2.318186305  | 1.32355481   | 8.064947247 | 0.0102244 | 0.515927261 |
| ENSMUSG00000097075 | NA            | 2.167253739  | 2.005591141  | 8.051785747 | 0.0102769 | 0.515927261 |
| ENSMUSG00000088990 | NA            | -3.25133153  | 1.348697859  | 8.043919365 | 0.0103085 | 0.515927261 |
| ENSMUSG00000045659 | Plekha7       | 0.895227691  | 5.643172266  | 8.025936457 | 0.0103810 | 0.515927261 |
| ENSMUSG00000026017 | Carf          | 0.872881812  | 4.5698174    | 8.019630123 | 0.0104065 | 0.515927261 |
| ENSMUSG00000024661 | Fth1          | -0.82411202  | 4.959793168  | 8.008538853 | 0.0104516 | 0.515927261 |
| ENSMUSG00000027624 | Epb4.1l1      | -0.605174987 | 7.364533912  | 8.008227974 | 0.0104529 | 0.515927261 |
| ENSMUSG00000026833 | Olfm1         | -0.926380064 | 4.311272784  | 8.006385059 | 0.0104604 | 0.515927261 |
| ENSMUSG00000079465 | Col4a3        | 0.873363679  | 5.217616546  | 8.001124748 | 0.0104819 | 0.515927261 |
| ENSMUSG00000037089 | Slc35b2       | -1.907089001 | 2.269462348  | 7.98810776  | 0.0105353 | 0.515927261 |
| ENSMUSG00000033458 | Fan1          | 2.037421559  | 3.019354172  | 7.960305931 | 0.0106503 | 0.515927261 |
| ENSMUSG00000059571 | NA            | 3.684164195  | 1.960691202  | 8.045650695 | 0.0106700 | 0.515927261 |
| ENSMUSG00000096547 | NA            | -3.42276486  | -0.746526575 | 7.955537114 | 0.0106702 | 0.515927261 |
| ENSMUSG00000025092 | Hspa12a       | -0.609520889 | 6.524828171  | 7.947809999 | 0.0107025 | 0.515927261 |
| ENSMUSG00000083844 | 2210015D19Rik | 0.854500897  | 5.157332984  | 7.946963559 | 0.0107061 | 0.515927261 |
| ENSMUSG00000025050 | Pcgf6         | 1.388105056  | 3.621789315  | 7.946403954 | 0.0107084 | 0.515927261 |
| ENSMUSG00000034462 | Pkd2          | 0.543778539  | 6.609063954  | 7.9355737   | 0.0107539 | 0.515927261 |
| ENSMUSG00000026455 | Klhl12        | 1.10131674   | 4.515868873  | 7.927930646 | 0.0107861 | 0.515927261 |
| ENSMUSG00000058006 | Mdn1          | 0.469369745  | 7.181650721  | 7.915628306 | 0.0108382 | 0.515927261 |
| ENSMUSG00000034247 | Plekhm1       | 0.67918663   | 5.85305219   | 7.911317618 | 0.0108565 | 0.515927261 |
| ENSMUSG00000024601 | Isoc1         | -0.658373243 | 6.429812791  | 7.900666976 | 0.0109019 | 0.515927261 |
| ENSMUSG0000003235  | Eif2b5        | 0.93265881   | 4.408209097  | 7.890761302 | 0.0109444 | 0.515927261 |
| ENSMUSG0000004939  | Nmrk2         | 1.08478087   | 4.563520802  | 7.883341523 | 0.0109763 | 0.515927261 |
| ENSMUSG00000027656 | Wisp2         | 2.449222449  | 2.257648555  | 7.865017272 | 0.0110555 | 0.517629421 |
| ENSMUSG00000098230 | 1700095B10Rik | 2.861788729  | 0.909480872  | 7.81667749  | 0.0112676 | 0.522527997 |
| ENSMUSG00000039176 | Polg          | 1.169118397  | 3.336409944  | 7.809302839 | 0.0113003 | 0.522527997 |
| ENSMUSG00000049299 | Trappc1       | -0.611476648 | 6.227238025  | 7.808344198 | 0.0113046 | 0.522527997 |
| ENSMUSG00000009378 | Slc16a12      | -1.625104748 | 3.237850909  | 7.799737236 | 0.0113430 | 0.522527997 |
| ENSMUSG00000059623 | Olftr39       | 1.885053777  | 2.831725483  | 7.792084677 | 0.0113772 | 0.522527997 |
| ENSMUSG00000085925 | Rtl1          | 1.747420841  | 2.956979093  | 7.769937848 | 0.0114770 | 0.525105709 |
| ENSMUSG00000007670 | Khsrp         | -0.579063321 | 6.221006774  | 7.740986857 | 0.0116089 | 0.529128327 |
| ENSMUSG00000089185 | NA            | 4.884579243  | -1.032590647 | 8.113703666 | 0.0117882 | 0.533549745 |
| ENSMUSG00000090105 | NA            | 2.817732885  | 0.455892867  | 7.700846057 | 0.0117946 | 0.533549745 |
| ENSMUSG00000073684 | 2610002J02Rik | -1.849485601 | 2.059164508  | 7.68594852  | 0.0118643 | 0.534695211 |
| ENSMUSG00000026694 | Mettl13       | 1.637603369  | 3.162180099  | 7.659706248 | 0.0119883 | 0.536509663 |
| ENSMUSG00000056167 | Cnot10        | 0.905284888  | 4.399698577  | 7.656760677 | 0.0120024 | 0.536509663 |
| ENSMUSG00000087362 | Gm13710       | 2.784804618  | 1.223728122  | 7.643183665 | 0.0120672 | 0.536509663 |
| ENSMUSG00000022103 | Gfra2         | -0.752007099 | 5.699860653  | 7.639889367 | 0.0120829 | 0.536509663 |
| ENSMUSG00000025921 | Rdh10         | 1.436704464  | 2.943527929  | 7.613389389 | 0.0122108 | 0.539522379 |
| ENSMUSG00000021614 | Vcan          | -0.411742525 | 9.689718555  | 7.60120541  | 0.0122700 | 0.539522379 |
| ENSMUSG00000032782 | Cntrob        | 1.5532186    | 3.251211712  | 7.595061451 | 0.0123000 | 0.539522379 |



|                     |               |              |              |             |           |             |
|---------------------|---------------|--------------|--------------|-------------|-----------|-------------|
| ENSMUSG00000086040  | Wipf3         | -0.515054963 | 8.107058887  | 7.588916419 | 0.0123301 | 0.539522379 |
| ENSMUSG00000005442  | Cic           | -0.560437424 | 7.526928183  | 7.578452846 | 0.0123816 | 0.539810311 |
| ENSMUSG000000033676 | Gabrb3        | -0.843848297 | 5.860013932  | 7.558635731 | 0.0124797 | 0.54212238  |
| ENSMUSG000000060073 | Psma3         | 1.547857796  | 3.678645136  | 7.542124934 | 0.0125621 | 0.542288545 |
| ENSMUSG000000027447 | Cst3          | -0.440313961 | 7.294175695  | 7.532585859 | 0.0126099 | 0.542288545 |
| ENSMUSG000000088230 | NA            | 4.161675689  | -1.367260663 | 7.912030919 | 0.0126828 | 0.542288545 |
| ENSMUSG000000013629 | Cad           | -1.152401179 | 3.837690233  | 7.515102058 | 0.0126982 | 0.542288545 |
| ENSMUSG000000080723 | NA            | 2.927548415  | 0.030568776  | 7.49830956  | 0.0127837 | 0.542288545 |
| ENSMUSG000000033543 | Gtf2a2        | 0.710729214  | 5.188436222  | 7.4797732   | 0.0128787 | 0.542288545 |
| ENSMUSG000000028343 | Erp44         | -0.894779599 | 4.499584387  | 7.473319609 | 0.0129120 | 0.542288545 |
| ENSMUSG000000064814 | NA            | 3.034405689  | -0.540874359 | 7.461139208 | 0.0129751 | 0.542288545 |
| ENSMUSG000000034165 | Ccnd3         | -0.728354099 | 5.533745866  | 7.460087406 | 0.0129805 | 0.542288545 |
| ENSMUSG000000026442 | Nfasc         | -0.557863908 | 8.632966835  | 7.452447198 | 0.0130203 | 0.542288545 |
| ENSMUSG000000027628 | Aar2          | 1.516647929  | 3.297803039  | 7.446622983 | 0.0130507 | 0.542288545 |
| ENSMUSG000000052727 | Map1b         | -0.34456379  | 10.95344327  | 7.444224414 | 0.0130632 | 0.542288545 |
| ENSMUSG000000037572 | Wdhd1         | -1.34741182  | 3.192996017  | 7.443054016 | 0.0130694 | 0.542288545 |
| ENSMUSG000000030889 | Vwa3a         | 1.72495121   | 2.494229375  | 7.429063321 | 0.0131428 | 0.543463137 |
| ENSMUSG000000020271 | Fbxw11        | -0.548606548 | 6.410037262  | 7.408993824 | 0.0132490 | 0.544800565 |
| ENSMUSG000000056962 | Jmjd6         | 1.332435237  | 3.344096969  | 7.391787302 | 0.0133409 | 0.544800565 |
| ENSMUSG000000053930 | Shisa6        | -0.666105866 | 6.441138718  | 7.387040549 | 0.0133663 | 0.544800565 |
| ENSMUSG000000025591 | Tma16         | -1.07747051  | 3.984826878  | 7.372396362 | 0.0134452 | 0.544800565 |
| ENSMUSG000000011382 | Dhdh          | -0.834589517 | 5.8124311    | 7.357138627 | 0.0135279 | 0.544800565 |
| ENSMUSG000000059554 | Ccdc28a       | 2.129394858  | 2.82934184   | 7.354427469 | 0.0135427 | 0.544800565 |
| ENSMUSG000000066621 | Tecpr1        | 1.109461579  | 4.356021631  | 7.353891841 | 0.0135456 | 0.544800565 |
| ENSMUSG000000020700 | Map3k3        | -0.873093073 | 4.714408398  | 7.349781305 | 0.0135680 | 0.544800565 |
| ENSMUSG000000029648 | Flt1          | 0.534712213  | 6.825129344  | 7.342905648 | 0.0136056 | 0.544800565 |
| ENSMUSG000000020648 | Dus4l         | 1.777930974  | 2.629551869  | 7.338834378 | 0.0136279 | 0.544800565 |
| ENSMUSG000000068686 | Cd59b         | -2.627657772 | 1.405880334  | 7.316192365 | 0.0137528 | 0.5463919   |
| ENSMUSG000000044067 | Gpr22         | -0.536071686 | 7.745361466  | 7.315152307 | 0.0137586 | 0.5463919   |
| ENSMUSG000000024978 | Gpam          | 0.768774028  | 5.241360697  | 7.283245376 | 0.0139368 | 0.550127511 |
| ENSMUSG000000053774 | Ubxn7         | -0.488099064 | 7.0303078    | 7.2819497   | 0.0139441 | 0.550127511 |
| ENSMUSG000000038267 | Slc22a23      | 1.258136711  | 3.685997075  | 7.26022894  | 0.0140669 | 0.551037359 |
| ENSMUSG000000039115 | Itga9         | 0.910022548  | 8.005313328  | 7.654241169 | 0.0140671 | 0.551037359 |
| ENSMUSG000000006717 | Acot13        | 0.587193381  | 6.176941169  | 7.235540562 | 0.0142081 | 0.551037359 |
| ENSMUSG000000037965 | Zc3h7a        | 0.525476635  | 6.69669305   | 7.235051431 | 0.0142109 | 0.551037359 |
| ENSMUSG000000035864 | Syt1          | -2.445323216 | 2.651321502  | 7.202969618 | 0.0144245 | 0.551037359 |
| ENSMUSG000000038403 | Hfe2          | -0.679548751 | 5.323216486  | 7.186933569 | 0.0144906 | 0.551037359 |
| ENSMUSG000000024604 | Rbm22         | 0.85563354   | 5.264567524  | 7.186480203 | 0.0144932 | 0.551037359 |
| ENSMUSG000000036087 | Slain2        | 0.49252982   | 8.041880908  | 7.186305257 | 0.0144943 | 0.551037359 |
| ENSMUSG000000002395 | Use1          | 1.231812493  | 3.443608225  | 7.171430942 | 0.0145820 | 0.551037359 |
| ENSMUSG000000052760 | A630001G21Rik | 1.749733323  | 1.767875032  | 7.149909497 | 0.0147100 | 0.551037359 |
| ENSMUSG000000058402 | Zfp420        | 1.309072145  | 3.685434847  | 7.145128554 | 0.0147386 | 0.551037359 |
| ENSMUSG000000007080 | Pole          | -0.789592219 | 5.020319044  | 7.141393794 | 0.0147610 | 0.551037359 |
| ENSMUSG000000058997 | Vwa8          | -0.44161378  | 7.352755258  | 7.141192298 | 0.0147622 | 0.551037359 |
| ENSMUSG000000074243 | NA            | 2.968842493  | 0.750696754  | 7.140025617 | 0.0147692 | 0.551037359 |
| ENSMUSG000000016206 | H2-M3         | 2.445788038  | 2.061656791  | 7.137445935 | 0.0147847 | 0.551037359 |
| ENSMUSG000000026360 | Rgs2          | -0.848383163 | 5.080755057  | 7.132796194 | 0.0148127 | 0.551037359 |
| ENSMUSG000000043822 | Adamts15      | 0.870604758  | 5.690865477  | 7.126095905 | 0.0148531 | 0.551037359 |
| ENSMUSG000000020460 | NA            | 1.639564293  | 3.255103448  | 7.122099183 | 0.0148773 | 0.551037359 |
| ENSMUSG000000018326 | Ywhab         | -0.365574278 | 8.915787283  | 7.114801558 | 0.0149215 | 0.551037359 |
| ENSMUSG000000030871 | Ears2         | 1.281264086  | 4.10348568   | 7.104972413 | 0.0149813 | 0.551037359 |
| ENSMUSG000000010048 | Ifrd2         | 1.403035146  | 3.230476058  | 7.095100357 | 0.0150417 | 0.551037359 |
| ENSMUSG000000007817 | Zmiz1         | -0.386257629 | 9.430051489  | 7.090266538 | 0.0150714 | 0.551037359 |
| ENSMUSG000000035566 | Pcdh17        | -0.675099186 | 6.080278961  | 7.086242053 | 0.0150961 | 0.551037359 |
| ENSMUSG000000022883 | Robo1         | -0.74408764  | 9.028352189  | 7.338336462 | 0.0151030 | 0.551037359 |

|                     |               |              |              |             |           |             |
|---------------------|---------------|--------------|--------------|-------------|-----------|-------------|
| ENSMUSG00000100672  | NA            | 2.650267048  | 0.374044916  | 7.065702793 | 0.0152231 | 0.551037359 |
| ENSMUSG00000039960  | Rhou          | 1.038422798  | 4.344969447  | 7.048230191 | 0.0153320 | 0.551037359 |
| ENSMUSG000000081679 | NA            | -3.279051861 | -0.615731078 | 7.035811761 | 0.0154100 | 0.551037359 |
| ENSMUSG000000031239 | ltn2a         | -1.00405576  | 4.631734438  | 7.016482944 | 0.0155322 | 0.551037359 |
| ENSMUSG000000028348 | Murc          | 1.553362026  | 4.065646259  | 7.015157491 | 0.0155407 | 0.551037359 |
| ENSMUSG000000072852 | NA            | 2.570165628  | 3.978276785  | 7.456138893 | 0.0156480 | 0.551037359 |
| ENSMUSG000000039470 | Zdhhc2        | -0.824871442 | 5.093160965  | 6.994006464 | 0.0156757 | 0.551037359 |
| ENSMUSG000000036461 | Elf1          | 0.624371757  | 5.35734525   | 6.979867336 | 0.0157668 | 0.551037359 |
| ENSMUSG000000020256 | Aldh1l2       | -0.504349595 | 6.864180439  | 6.964986455 | 0.0158633 | 0.551037359 |
| ENSMUSG000000026974 | Zmynd19       | 1.557991613  | 2.634260235  | 6.964188684 | 0.0158684 | 0.551037359 |
| ENSMUSG000000020340 | Cyfp2         | -0.904579391 | 5.002122244  | 6.951239334 | 0.0159530 | 0.551037359 |
| ENSMUSG000000040283 | Btnl9         | 0.721136237  | 5.882117752  | 6.942324437 | 0.0160114 | 0.551037359 |
| ENSMUSG000000026005 | Rpe           | -0.825830734 | 4.712589607  | 6.941210334 | 0.0160187 | 0.551037359 |
| ENSMUSG000000090399 | NA            | 1.605498352  | 2.447415009  | 6.937502103 | 0.0160432 | 0.551037359 |
| ENSMUSG000000049134 | Nrap          | 0.483354799  | 8.450281617  | 6.934958651 | 0.0160599 | 0.551037359 |
| ENSMUSG000000022561 | Gpaa1         | 1.564920222  | 2.278131041  | 6.925999101 | 0.0161191 | 0.551037359 |
| ENSMUSG000000030138 | Bms1          | 0.654218478  | 6.372859862  | 6.925528209 | 0.0161222 | 0.551037359 |
| ENSMUSG000000024098 | Twsg1         | -0.387815403 | 8.276639116  | 6.920518111 | 0.0161555 | 0.551037359 |
| ENSMUSG000000024758 | Rtn3          | -0.437588275 | 7.813943935  | 6.919270472 | 0.0161638 | 0.551037359 |
| ENSMUSG000000027993 | Trim2         | -0.520131612 | 6.576092567  | 6.917987901 | 0.0161723 | 0.551037359 |
| ENSMUSG000000074629 | NA            | 1.355199552  | 3.1873792    | 6.900684518 | 0.0162877 | 0.551037359 |
| ENSMUSG000000083112 | NA            | 2.824558722  | -0.237660477 | 6.894810576 | 0.0163272 | 0.551037359 |
| ENSMUSG000000019945 | 1700040L02Rik | -0.912296091 | 4.496723689  | 6.891124381 | 0.0163519 | 0.551037359 |
| ENSMUSG000000073117 | Gm7347        | -1.745699647 | 3.188631831  | 6.890960363 | 0.0163530 | 0.551037359 |
| ENSMUSG000000041571 | Sepw1         | -0.903266186 | 4.615389509  | 6.876548771 | 0.0164504 | 0.551037359 |
| ENSMUSG000000020263 | Appl2         | 0.696347184  | 6.621874952  | 6.872985015 | 0.0164745 | 0.551037359 |
| ENSMUSG000000013921 | Clip3         | -0.487082408 | 6.975068343  | 6.870642607 | 0.0164904 | 0.551037359 |
| ENSMUSG000000078779 | Zfp59         | 2.254751703  | 1.733340608  | 6.865183453 | 0.0165276 | 0.551037359 |
| ENSMUSG000000056978 | Hamp2         | 3.073099823  | -0.375563717 | 6.828552688 | 0.0167792 | 0.551037359 |
| ENSMUSG000000038677 | Scube3        | 1.522770102  | 3.617174404  | 6.826508167 | 0.0167933 | 0.551037359 |
| ENSMUSG000000058441 | Panx2         | -1.34020802  | 3.845390258  | 6.824569144 | 0.0168068 | 0.551037359 |
| ENSMUSG000000097577 | NA            | 1.217817022  | 3.143404319  | 6.814412618 | 0.0168774 | 0.551037359 |
| ENSMUSG000000064595 | NA            | 2.917279963  | -0.429812962 | 6.799220561 | 0.0169838 | 0.551037359 |
| ENSMUSG000000002870 | Mcm2          | -0.854177881 | 4.537383371  | 6.796784447 | 0.0170009 | 0.551037359 |
| ENSMUSG000000084552 | NA            | 2.956180145  | -0.195935393 | 6.795197119 | 0.0170120 | 0.551037359 |
| ENSMUSG000000045594 | Glb1          | -1.325916201 | 3.919692236  | 6.792912733 | 0.0170281 | 0.551037359 |
| ENSMUSG000000024395 | Lims2         | 1.266815863  | 4.111825213  | 6.789927951 | 0.0170491 | 0.551037359 |
| ENSMUSG000000019868 | Vta1          | -1.14177404  | 3.584683483  | 6.788520364 | 0.0170591 | 0.551037359 |
| ENSMUSG000000028986 | Klhl7         | -0.52263328  | 6.405655285  | 6.778871666 | 0.0171273 | 0.551037359 |
| ENSMUSG000000050471 | Fam118b       | 0.723808726  | 4.967005479  | 6.776079794 | 0.0171471 | 0.551037359 |
| ENSMUSG000000003032 | Klf4          | 0.859810597  | 4.668271698  | 6.770825906 | 0.0171845 | 0.551037359 |
| ENSMUSG000000085782 | NA            | 1.787362304  | 2.244896897  | 6.770212168 | 0.0171888 | 0.551037359 |
| ENSMUSG000000032680 | 6820408C15Rik | 1.838446835  | 2.463777445  | 6.769525637 | 0.0171937 | 0.551037359 |
| ENSMUSG000000096807 | Hist1h2bm     | -2.276461693 | 1.435008067  | 6.769027165 | 0.0171973 | 0.551037359 |
| ENSMUSG000000023249 | Parp3         | 1.315971218  | 3.225574069  | 6.768693422 | 0.0171996 | 0.551037359 |
| ENSMUSG000000038936 | Sccpdh        | 0.628346541  | 5.581982623  | 6.75077696  | 0.0173278 | 0.551037359 |
| ENSMUSG000000081123 | NA            | 1.974856841  | 1.416352992  | 6.750646281 | 0.0173287 | 0.551037359 |
| ENSMUSG000000048429 | 1810026J23Rik | 0.919320446  | 4.743823983  | 6.736123663 | 0.0174334 | 0.551037359 |
| ENSMUSG000000080237 | NA            | 2.077559599  | 1.262981005  | 6.735983527 | 0.0174344 | 0.551037359 |
| ENSMUSG000000021747 | 4930452B06Rik | -1.401585952 | 2.740178394  | 6.735763304 | 0.0174360 | 0.551037359 |
| ENSMUSG000000050592 | Fam78a        | -0.875776786 | 6.635825     | 6.827235931 | 0.0174389 | 0.551037359 |
| ENSMUSG000000086877 | NA            | 1.831956196  | 3.028219645  | 6.734178515 | 0.0174475 | 0.551037359 |
| ENSMUSG000000028488 | Sh3gl2        | -1.498569273 | 3.666585564  | 6.721653877 | 0.0175384 | 0.552458653 |
| ENSMUSG000000092274 | NA            | 0.569446033  | 9.338229874  | 6.717499524 | 0.0175994 | 0.552932399 |
| ENSMUSG000000024246 | Thumpd2       | 1.843727226  | 2.556939492  | 6.688136031 | 0.0177843 | 0.557199747 |

|                     |               |              |              |             |           |             |
|---------------------|---------------|--------------|--------------|-------------|-----------|-------------|
| ENSMUSG00000045327  | 6330549D23Rik | 0.95178245   | 4.253562541  | 6.681371972 | 0.0178344 | 0.557199747 |
| ENSMUSG00000020832  | Eral1         | 1.066320446  | 3.94610361   | 6.666128388 | 0.0179479 | 0.557199747 |
| ENSMUSG00000033542  | Arhgef5       | 0.779051065  | 5.230367532  | 6.656294606 | 0.0180215 | 0.557199747 |
| ENSMUSG00000034334  | Fam151b       | 2.394987169  | 1.639138296  | 6.655339709 | 0.0180287 | 0.557199747 |
| ENSMUSG00000004698  | Hdac9         | -0.594594146 | 6.840774153  | 6.655167862 | 0.0180300 | 0.557199747 |
| ENSMUSG00000006564  | Mirlet7b      | 4.26389416   | -1.324136488 | 6.958724709 | 0.0181166 | 0.557199747 |
| ENSMUSG000000032452 | Clstn2        | -1.218286342 | 4.437069068  | 6.641523703 | 0.0181328 | 0.557199747 |
| ENSMUSG000000064343 | NA            | 1.416875931  | 3.864124947  | 6.637028139 | 0.0181668 | 0.557199747 |
| ENSMUSG000000032735 | Ablim3        | 0.626955786  | 5.864108001  | 6.632877368 | 0.0181982 | 0.557199747 |
| ENSMUSG000000040721 | Zfhx2         | 0.720786782  | 5.253942935  | 6.624992161 | 0.0182582 | 0.557439263 |
| ENSMUSG000000027030 | Stk39         | 0.864147588  | 6.610146136  | 6.673898967 | 0.0183787 | 0.557439263 |
| ENSMUSG000000051627 | Hist1h1e      | -0.87971803  | 5.278059942  | 6.607096356 | 0.0183951 | 0.557439263 |
| ENSMUSG000000034255 | Arhgap27      | 1.423924101  | 3.862091898  | 6.603398718 | 0.0184235 | 0.557439263 |
| ENSMUSG000000015090 | Ptgds         | 1.330679845  | 3.960655254  | 6.600895904 | 0.0184428 | 0.557439263 |
| ENSMUSG000000006221 | Hspb7         | 0.348503513  | 11.16149568  | 6.595364248 | 0.0184854 | 0.557439263 |
| ENSMUSG000000036061 | Smug1         | 1.238206104  | 3.570933644  | 6.589555406 | 0.0185304 | 0.557439263 |
| ENSMUSG000000043557 | Mdga1         | -0.832452152 | 6.624262866  | 6.628617019 | 0.0187136 | 0.560328536 |
| ENSMUSG000000078349 | NA            | 1.282635607  | 3.703658362  | 6.565266031 | 0.0187195 | 0.560328536 |
| ENSMUSG000000048040 | NA            | -1.759135146 | 1.328585526  | 6.534998241 | 0.0189583 | 0.562481778 |
| ENSMUSG000000028040 | Efna4         | 1.892642464  | 2.952441205  | 6.527657694 | 0.0190167 | 0.562481778 |
| ENSMUSG000000093404 | NA            | 4.224076384  | -1.352049287 | 6.830986384 | 0.0190306 | 0.562481778 |
| ENSMUSG000000041203 | 2310036O22Rik | -1.157029444 | 3.503223037  | 6.522506707 | 0.0190579 | 0.562481778 |
| ENSMUSG000000097391 | Mirg          | 1.229851208  | 3.635047787  | 6.516870644 | 0.0191030 | 0.562481778 |
| ENSMUSG000000021936 | Mapk8         | 0.520050511  | 6.100447056  | 6.51648178  | 0.0191061 | 0.562481778 |
| ENSMUSG000000030339 | Ltbr          | 1.230956638  | 2.876398498  | 6.514909974 | 0.0191187 | 0.562481778 |
| ENSMUSG000000020044 | Timp3         | -0.382996222 | 9.788335469  | 6.505186493 | 0.0191968 | 0.563404085 |
| ENSMUSG000000032565 | Nudt16        | 1.2152023    | 3.998843217  | 6.498752125 | 0.0192488 | 0.563553522 |
| ENSMUSG000000020381 | 3010026O09Rik | 3.652164086  | 2.801067162  | 6.863345202 | 0.0195214 | 0.568932689 |
| ENSMUSG000000025871 | 4833439L19Rik | -0.465513657 | 6.986089827  | 6.464596751 | 0.0195271 | 0.568932689 |
| ENSMUSG000000020718 | Polg2         | 1.495496309  | 3.30395999   | 6.458788468 | 0.0195748 | 0.568947007 |
| ENSMUSG000000032259 | Drd2          | -1.799280144 | 3.717535269  | 6.472248396 | 0.0197234 | 0.571884185 |
| ENSMUSG000000028397 | Kdm4c         | -0.499930176 | 6.50771743   | 6.423648083 | 0.0198667 | 0.572611309 |
| ENSMUSG000000086212 | Mkln1os       | 1.345225587  | 3.109465999  | 6.421767614 | 0.0198824 | 0.572611309 |
| ENSMUSG000000032666 | 1700025G04Rik | 0.611059793  | 6.807033443  | 6.419863504 | 0.0198984 | 0.572611309 |
| ENSMUSG000000031618 | Nr3c2         | -0.573395233 | 6.277426881  | 6.415049724 | 0.0199388 | 0.572611309 |
| ENSMUSG000000032898 | Fbxo21        | -0.595611376 | 5.990219896  | 6.404238471 | 0.0200300 | 0.572758719 |
| ENSMUSG000000027326 | Casc5         | -1.033336478 | 4.662580305  | 6.399467907 | 0.0200704 | 0.572758719 |
| ENSMUSG000000039536 | Stau1         | -0.512348111 | 6.926659608  | 6.392553128 | 0.0201290 | 0.572758719 |
| ENSMUSG000000042529 | Kcnj12        | -0.765292962 | 4.664068059  | 6.391924176 | 0.0201344 | 0.572758719 |
| ENSMUSG000000028470 | Hint2         | 1.336173218  | 2.84923661   | 6.370418485 | 0.0203181 | 0.576623208 |
| ENSMUSG000000034275 | Igsf9b        | -0.854158812 | 6.03907682   | 6.342437811 | 0.0205601 | 0.576698998 |
| ENSMUSG000000020866 | Cacna1g       | -0.486157592 | 9.564513441  | 6.335002731 | 0.0206249 | 0.576698998 |
| ENSMUSG000000055271 | NA            | -2.483086582 | 1.745534433  | 6.33436276  | 0.0206305 | 0.576698998 |
| ENSMUSG000000064365 | NA            | 2.24243811   | 1.592473729  | 6.332344065 | 0.0206481 | 0.576698998 |
| ENSMUSG000000048794 | Ccdc37        | 2.118872719  | 2.225920325  | 6.329747822 | 0.0206709 | 0.576698998 |
| ENSMUSG000000045414 | 1190002N15Rik | -0.557002007 | 6.957008097  | 6.329578231 | 0.0206723 | 0.576698998 |
| ENSMUSG000000047123 | Ticam1        | -0.667880862 | 5.464543702  | 6.329571005 | 0.0206724 | 0.576698998 |
| ENSMUSG000000088344 | NA            | 3.913587989  | -1.44117012  | 6.611805931 | 0.0207251 | 0.576698998 |
| ENSMUSG000000027459 | Fam110a       | -1.643912685 | 2.970001116  | 6.320485293 | 0.0207522 | 0.576698998 |
| ENSMUSG000000058192 | Zfp846        | 1.184395572  | 3.317332566  | 6.291251771 | 0.0210111 | 0.581920784 |
| ENSMUSG000000021518 | Ptdss1        | -0.777418984 | 4.922049152  | 6.288372717 | 0.0210368 | 0.581920784 |
| ENSMUSG000000007589 | Tinf2         | -1.287958376 | 2.682227974  | 6.261573288 | 0.0212777 | 0.586398339 |
| ENSMUSG000000087331 | 1810021B22Rik | -2.185517736 | 1.703928676  | 6.259536548 | 0.0212961 | 0.586398339 |
| ENSMUSG000000031145 | Prickle3      | 1.089762568  | 4.07668116   | 6.252679446 | 0.0213583 | 0.586459669 |
| ENSMUSG000000047731 | Wbp1l         | -0.53522679  | 6.32800549   | 6.243456792 | 0.0214423 | 0.586459669 |



|                    |               |              |              |             |           |             |
|--------------------|---------------|--------------|--------------|-------------|-----------|-------------|
| ENSMUSG00000025465 | Echs1         | 1.086241463  | 4.032675472  | 6.243208126 | 0.0214445 | 0.586459669 |
| ENSMUSG00000091587 | NA            | 2.376511267  | 1.773331911  | 6.213427256 | 0.0217183 | 0.591100668 |
| ENSMUSG00000027244 | Atg13         | 0.811427459  | 6.062686753  | 6.205337553 | 0.0217933 | 0.591100668 |
| ENSMUSG00000032026 | Rexo2         | 0.564349189  | 6.477974242  | 6.194694844 | 0.0218925 | 0.591100668 |
| ENSMUSG00000045045 | Lrfn4         | -1.643659837 | 2.433180069  | 6.187163814 | 0.0219630 | 0.591100668 |
| ENSMUSG00000020777 | Acox1         | 0.523282622  | 6.289888295  | 6.168952379 | 0.0221345 | 0.591100668 |
| ENSMUSG00000041261 | Car8          | 1.619901886  | 2.93636382   | 6.165745763 | 0.0221648 | 0.591100668 |
| ENSMUSG00000019923 | Zwint         | -0.613203895 | 6.48082191   | 6.164168626 | 0.0221798 | 0.591100668 |
| ENSMUSG00000098453 | NA            | 3.216308195  | -1.154276152 | 6.163838373 | 0.0221829 | 0.591100668 |
| ENSMUSG00000083606 | NA            | -1.660549958 | 1.995181179  | 6.154567135 | 0.0222710 | 0.591100668 |
| ENSMUSG00000087231 | E230016M11Rik | 1.865980475  | 2.764703393  | 6.150786326 | 0.0223070 | 0.591100668 |
| ENSMUSG00000077360 | NA            | 2.919341759  | 0.22075309   | 6.138543017 | 0.0224242 | 0.591100668 |
| ENSMUSG00000027217 | Tspan18       | -0.337711002 | 9.097590387  | 6.137173442 | 0.0224373 | 0.591100668 |
| ENSMUSG00000020496 | Rnf187        | -0.619628009 | 6.683866272  | 6.135348871 | 0.0224549 | 0.591100668 |
| ENSMUSG00000031523 | Dlc1          | -0.371197164 | 9.067395252  | 6.133112763 | 0.0224764 | 0.591100668 |
| ENSMUSG00000052889 | Prkcb         | 1.958763401  | 2.212404443  | 6.130351314 | 0.0225029 | 0.591100668 |
| ENSMUSG00000038296 | Galnt18       | -1.226115662 | 3.706648744  | 6.126500893 | 0.0225401 | 0.591100668 |
| ENSMUSG00000065943 | NA            | 3.177281047  | 0.256805209  | 6.126122857 | 0.0225437 | 0.591100668 |
| ENSMUSG00000044707 | Ccnjl         | -0.975011276 | 4.62810644   | 6.124901375 | 0.0225555 | 0.591100668 |
| ENSMUSG00000035004 | Igsf6         | 1.45138117   | 2.603128284  | 6.122213258 | 0.0225815 | 0.591100668 |
| ENSMUSG00000018189 | Uchl5         | -1.013825421 | 4.554123555  | 6.117676077 | 0.0226255 | 0.591100668 |
| ENSMUSG00000032648 | Pygm          | -0.403660906 | 7.442357559  | 6.110525693 | 0.0226949 | 0.591100668 |
| ENSMUSG00000035835 | Lppr3         | 0.665649026  | 5.513639922  | 6.110517964 | 0.0226950 | 0.591100668 |
| ENSMUSG00000087692 | NA            | -2.877670856 | 0.457671924  | 6.102476659 | 0.0227733 | 0.591860939 |
| ENSMUSG00000004929 | Thop1         | 1.573220085  | 2.957756256  | 6.095462163 | 0.0228420 | 0.592326696 |
| ENSMUSG00000029426 | Scarb2        | -0.605703946 | 5.861160543  | 6.085514045 | 0.0229397 | 0.592326696 |
| ENSMUSG00000029875 | Ccdc184       | -1.496674108 | 5.185148447  | 6.36492186  | 0.0230050 | 0.592326696 |
| ENSMUSG00000039485 | Tspyl4        | -1.180045915 | 4.18632136   | 6.075927565 | 0.0230343 | 0.592326696 |
| ENSMUSG00000056492 | Gpr116        | 0.431884962  | 7.920784225  | 6.075613559 | 0.0230374 | 0.592326696 |
| ENSMUSG00000016262 | Sertad4       | -0.406508044 | 7.55657773   | 6.064060633 | 0.0231520 | 0.594004439 |
| ENSMUSG00000044938 | Klhl31        | 0.379237608  | 8.626346811  | 6.045308658 | 0.0233394 | 0.597488108 |
| ENSMUSG00000041329 | Atp1b2        | -0.392780707 | 7.481642971  | 6.030326063 | 0.0234904 | 0.597488108 |
| ENSMUSG00000084983 | NA            | -1.465469449 | 2.765268206  | 6.02998921  | 0.0234938 | 0.597488108 |
| ENSMUSG00000085902 | NA            | 1.905991076  | 1.931466778  | 6.025932973 | 0.0235349 | 0.597488108 |
| ENSMUSG00000034807 | Glt25d1       | 0.845591706  | 4.550601035  | 6.025814553 | 0.0235361 | 0.597488108 |
| ENSMUSG00000020902 | Ntn1          | 0.991005347  | 4.645973674  | 6.012184106 | 0.0236747 | 0.597824238 |
| ENSMUSG00000030880 | Polr3e        | 1.3671579    | 3.340006497  | 6.008066412 | 0.0237167 | 0.597824238 |
| ENSMUSG00000027722 | Spata5        | 0.61877799   | 5.167744147  | 5.997646192 | 0.0238235 | 0.597824238 |
| ENSMUSG0000002486  | Tchp          | 1.339809618  | 3.246397824  | 5.996231005 | 0.0238380 | 0.597824238 |
| ENSMUSG00000024556 | Me2           | -1.127045849 | 3.950597724  | 5.987832883 | 0.0239246 | 0.597824238 |
| ENSMUSG00000080434 | NA            | -2.61039065  | -0.13591287  | 5.986865878 | 0.0239346 | 0.597824238 |
| ENSMUSG00000004865 | Srpk1         | 0.498817959  | 6.734093429  | 5.985919096 | 0.0239443 | 0.597824238 |
| ENSMUSG00000029474 | Rnf34         | 1.069665228  | 3.793819859  | 5.983474616 | 0.0239696 | 0.597824238 |
| ENSMUSG00000083280 | NA            | -1.950784539 | -0.02888359  | 5.976671855 | 0.0240401 | 0.597824238 |
| ENSMUSG00000055963 | Triqk         | -1.515065928 | 2.241413308  | 5.972636687 | 0.0240820 | 0.597824238 |
| ENSMUSG00000064179 | Tnnt1         | 1.115182448  | 3.566211066  | 5.968327407 | 0.0241269 | 0.597824238 |
| ENSMUSG00000019880 | Rspo3         | -0.592530222 | 7.095993709  | 5.966545217 | 0.0241455 | 0.597824238 |
| ENSMUSG00000020182 | Ddc           | -0.819486682 | 6.770695073  | 6.043068022 | 0.0243016 | 0.600454835 |
| ENSMUSG00000075590 | Nrbp2         | 0.536412126  | 6.776065048  | 5.943110021 | 0.0243913 | 0.600489312 |
| ENSMUSG00000036613 | Tssc1         | -1.846413533 | 1.988521958  | 5.942021244 | 0.0244028 | 0.600489312 |
| ENSMUSG00000024829 | Mrpl21        | 1.403143173  | 2.839053822  | 5.921149283 | 0.0246243 | 0.604702355 |
| ENSMUSG00000052459 | Atp6v1a       | -0.502556926 | 6.896068432  | 5.915806926 | 0.0246813 | 0.604868899 |
| ENSMUSG00000033943 | Mga           | 0.320457814  | 8.416811011  | 5.911064868 | 0.0247321 | 0.604881039 |
| ENSMUSG00000045409 | Trim39        | 0.800510914  | 5.074316937  | 5.905069899 | 0.0247965 | 0.605208386 |
| ENSMUSG00000096472 | Cdkn2d        | -1.929071135 | 2.152417944  | 5.899280312 | 0.0248588 | 0.605208386 |

|                    |               |              |              |             |           |             |
|--------------------|---------------|--------------|--------------|-------------|-----------|-------------|
| ENSMUSG00000084821 | Gm15880       | 1.422833979  | 3.556930646  | 5.893130436 | 0.0249252 | 0.605208386 |
| ENSMUSG00000037007 | Zfp113        | 0.833085239  | 4.318898692  | 5.886887725 | 0.0249928 | 0.605208386 |
| ENSMUSG00000054459 | Vsnl1         | -1.337251019 | 6.425179663  | 6.411238451 | 0.0249970 | 0.605208386 |
| ENSMUSG00000009079 | Ewsr1         | 0.387537855  | 7.406728488  | 5.874471081 | 0.0251278 | 0.605517497 |
| ENSMUSG00000020918 | Kat2a         | 0.801201794  | 5.50237597   | 5.870327948 | 0.0251731 | 0.605517497 |
| ENSMUSG00000098624 | NA            | 2.798267185  | -1.005199104 | 5.866320737 | 0.0252169 | 0.605517497 |
| ENSMUSG00000042743 | Sgtb          | -1.146263948 | 4.481943726  | 5.864656057 | 0.0252352 | 0.605517497 |
| ENSMUSG00000023960 | Enpp5         | -0.795549973 | 4.140147486  | 5.859199122 | 0.0252951 | 0.605517497 |
| ENSMUSG00000024457 | Trim26        | 0.631140189  | 5.674295865  | 5.857691553 | 0.0253117 | 0.605517497 |
| ENSMUSG00000014856 | Tmem208       | 1.491348775  | 2.176077556  | 5.851015229 | 0.0253852 | 0.606072497 |
| ENSMUSG00000038708 | Golga4        | 0.382301159  | 9.44724947   | 5.828173532 | 0.0256388 | 0.607004453 |
| ENSMUSG00000054640 | Slc8a1        | -0.415968141 | 8.778260986  | 5.827888677 | 0.0256419 | 0.607004453 |
| ENSMUSG00000045871 | Slitrk6       | -0.714680001 | 6.570430039  | 5.823566775 | 0.0256902 | 0.607004453 |
| ENSMUSG00000044244 | Il20rb        | 1.682245276  | 2.521773621  | 5.822022025 | 0.0257075 | 0.607004453 |
| ENSMUSG00000093561 | NA            | 1.575414172  | 3.033722542  | 5.820288994 | 0.0257269 | 0.607004453 |
| ENSMUSG00000083100 | NA            | 2.308688554  | 1.755865656  | 5.819606175 | 0.0257346 | 0.607004453 |
| ENSMUSG00000093132 | NA            | 2.992700443  | -0.609785417 | 5.808911211 | 0.0258548 | 0.607004453 |
| ENSMUSG00000096995 | 2810029C07Rik | -2.877433991 | 1.570141228  | 5.819431576 | 0.0258936 | 0.607004453 |
| ENSMUSG00000039725 | 2810408M09Rik | -1.489120878 | 3.457390704  | 5.802714231 | 0.0259247 | 0.607004453 |
| ENSMUSG00000000184 | Ccnd2         | -0.355850404 | 8.802723059  | 5.802359926 | 0.0259287 | 0.607004453 |
| ENSMUSG00000026014 | Raph1         | 0.343325186  | 8.766928342  | 5.796000118 | 0.0260007 | 0.607508206 |
| ENSMUSG00000070520 | Ndnf2         | -1.570454106 | 3.768114444  | 5.782570284 | 0.0261781 | 0.610454946 |
| ENSMUSG00000036327 | Qsox2         | 1.429507897  | 2.967743459  | 5.774216718 | 0.0262491 | 0.610454946 |
| ENSMUSG00000027206 | Cops2         | -0.477302501 | 6.128665721  | 5.765287291 | 0.0263516 | 0.610454946 |
| ENSMUSG00000051844 | B230319C09Rik | 1.620932729  | 1.849444132  | 5.743808808 | 0.0266002 | 0.610454946 |
| ENSMUSG00000069601 | Ank3          | -0.421783197 | 9.731099294  | 5.739887579 | 0.0266459 | 0.610454946 |
| ENSMUSG00000032009 | Sesn3         | -0.754752542 | 4.893604466  | 5.737685866 | 0.0266716 | 0.610454946 |
| ENSMUSG00000090389 | NA            | 1.207035405  | 2.451103586  | 5.736968933 | 0.0266799 | 0.610454946 |
| ENSMUSG00000073535 | NA            | 1.315834833  | 3.862678434  | 5.73596172  | 0.0266917 | 0.610454946 |
| ENSMUSG00000086847 | Tbx3os2       | 1.982527161  | 2.73687743   | 5.730486389 | 0.0267558 | 0.610454946 |
| ENSMUSG00000028614 | Ndc1          | 0.87476815   | 4.77238661   | 5.726612833 | 0.0268012 | 0.610454946 |
| ENSMUSG00000050244 | Heatr1        | 0.862630238  | 4.549365749  | 5.724197434 | 0.0268295 | 0.610454946 |
| ENSMUSG00000086855 | NA            | 2.22431862   | 1.255231256  | 5.720217086 | 0.0268763 | 0.610454946 |
| ENSMUSG00000066043 | Phactr4       | 0.581816277  | 6.986837361  | 5.719743357 | 0.0268819 | 0.610454946 |
| ENSMUSG00000065661 | NA            | 3.151691846  | -0.241743767 | 5.719658827 | 0.0268829 | 0.610454946 |
| ENSMUSG00000060477 | Irak2         | 1.482879842  | 3.133176744  | 5.715940448 | 0.0269267 | 0.610454946 |
| ENSMUSG00000027263 | Tubgcp4       | 0.789341601  | 5.067769317  | 5.711418071 | 0.0269801 | 0.610454946 |
| ENSMUSG00000049807 | Arhgap23      | -0.55465745  | 6.282806105  | 5.701826094 | 0.0270938 | 0.610454946 |
| ENSMUSG00000014602 | Kif1a         | -0.464977505 | 8.880603924  | 5.697307897 | 0.0271475 | 0.610454946 |
| ENSMUSG00000024542 | Cep192        | -0.46509234  | 6.468574753  | 5.688521663 | 0.0272524 | 0.610454946 |
| ENSMUSG00000048582 | Gja3          | -0.8897506   | 4.923667559  | 5.685964978 | 0.0272830 | 0.610454946 |
| ENSMUSG00000027078 | Ube2l6        | -1.058892896 | 3.608266641  | 5.685736095 | 0.0272857 | 0.610454946 |
| ENSMUSG00000001786 | Fbxo7         | 0.77901428   | 4.70972869   | 5.680095836 | 0.0273533 | 0.610454946 |
| ENSMUSG00000040596 | Pogk          | -0.550513105 | 6.369509158  | 5.675041979 | 0.0274141 | 0.610454946 |
| ENSMUSG00000028393 | Alad          | -1.218443716 | 2.996708235  | 5.672226569 | 0.0274480 | 0.610454946 |
| ENSMUSG00000015668 | Pdzd11        | -0.900628805 | 5.210479554  | 5.671132312 | 0.0274612 | 0.610454946 |
| ENSMUSG00000024423 | Impact        | -0.709901763 | 5.116585301  | 5.668118015 | 0.0274976 | 0.610454946 |
| ENSMUSG00000018796 | Acsl1         | 0.354237307  | 8.847042826  | 5.658213748 | 0.0276175 | 0.610454946 |
| ENSMUSG00000038351 | Sgsm2         | -0.813250838 | 4.104749132  | 5.653396201 | 0.0276761 | 0.610454946 |
| ENSMUSG00000078201 | Tmem203       | 2.130702607  | 0.745372214  | 5.651261598 | 0.0277021 | 0.610454946 |
| ENSMUSG00000064801 | NA            | 3.146157132  | -0.807666512 | 5.650916536 | 0.0277063 | 0.610454946 |
| ENSMUSG00000063052 | Lrrc40        | -0.982207038 | 3.960435434  | 5.650226108 | 0.0277147 | 0.610454946 |
| ENSMUSG00000024803 | Ankrd1        | 0.815696932  | 9.757386592  | 6.041302989 | 0.0277743 | 0.610454946 |
| ENSMUSG00000033054 | Npat          | -0.4638344   | 6.315570823  | 5.643156926 | 0.0278010 | 0.610454946 |
| ENSMUSG00000044894 | Uqcrq         | 1.49419102   | 2.808296043  | 5.634143736 | 0.0279115 | 0.610676217 |

|                     |               |              |              |             |           |             |
|---------------------|---------------|--------------|--------------|-------------|-----------|-------------|
| ENSMUSG0000007039   | Ddah2         | -1.661897264 | 2.062724792  | 5.633825746 | 0.0279154 | 0.610676217 |
| ENSMUSG00000024472  | Dcp2          | -0.452932789 | 6.643594633  | 5.623285879 | 0.0280452 | 0.610676217 |
| ENSMUSG00000027613  | Eif6          | -1.071785389 | 3.755083866  | 5.623231464 | 0.0280459 | 0.610676217 |
| ENSMUSG00000021668  | Polk          | 0.684819551  | 5.073223135  | 5.621699699 | 0.0280648 | 0.610676217 |
| ENSMUSG00000024436  | Mrps18b       | 1.720824724  | 1.602167537  | 5.606910935 | 0.0282483 | 0.611795966 |
| ENSMUSG00000039377  | Hlx           | -1.147287041 | 3.630922974  | 5.601113216 | 0.0283206 | 0.611795966 |
| ENSMUSG00000029468  | P2rx7         | 2.196680304  | 3.963551594  | 5.874778309 | 0.0283348 | 0.611795966 |
| ENSMUSG00000025878  | Uimc1         | 0.846743424  | 4.998484607  | 5.596443688 | 0.0283790 | 0.611795966 |
| ENSMUSG00000086964  | NA            | 2.084382507  | 0.935260072  | 5.59115143  | 0.0284453 | 0.611795966 |
| ENSMUSG00000046982  | Tshz1         | -0.425026802 | 7.191256296  | 5.590274801 | 0.0284563 | 0.611795966 |
| ENSMUSG00000028173  | Wls           | -0.755816435 | 5.145346406  | 5.586774512 | 0.0285003 | 0.611795966 |
| ENSMUSG00000098202  | NA            | 1.276893101  | 4.099672373  | 5.584636694 | 0.0285272 | 0.611795966 |
| ENSMUSG00000030629  | Zfand6        | -1.020491033 | 3.440799284  | 5.576996431 | 0.0286236 | 0.611795966 |
| ENSMUSG00000028318  | Polr1e        | 1.186517837  | 3.200320358  | 5.576661137 | 0.0286278 | 0.611795966 |
| ENSMUSG00000035949  | Fbxw2         | 0.627636261  | 5.958558777  | 5.572465592 | 0.0286809 | 0.611795966 |
| ENSMUSG00000044149  | Nkrf          | -0.891612094 | 3.800957532  | 5.568880464 | 0.0287264 | 0.611795966 |
| ENSMUSG00000059975  | Zfp74         | 0.626013277  | 5.613284332  | 5.564578584 | 0.0287810 | 0.611876984 |
| ENSMUSG00000024276  | Zfp397        | 0.470114679  | 6.049560967  | 5.55839316  | 0.0288598 | 0.612469936 |
| ENSMUSG00000035184  | Fam124a       | 1.732108161  | 2.45414446   | 5.522969696 | 0.0293158 | 0.620730042 |
| ENSMUSG00000080662  | NA            | 1.732082219  | 0.995217814  | 5.502103154 | 0.0295882 | 0.620730042 |
| ENSMUSG00000092973  | NA            | 3.164907864  | -1.167296469 | 5.496004061 | 0.0296683 | 0.620730042 |
| ENSMUSG00000070003  | Ssbp4         | 1.208033278  | 3.749077444  | 5.492439355 | 0.0297153 | 0.620730042 |
| ENSMUSG00000025558  | Dock9         | 0.606017626  | 6.340627953  | 5.492254153 | 0.0297177 | 0.620730042 |
| ENSMUSG00000097131  | NA            | 1.284315942  | 3.341892096  | 5.485743287 | 0.0298037 | 0.620730042 |
| ENSMUSG00000010175  | Prox1         | -0.424916063 | 8.739908239  | 5.47870936  | 0.0298970 | 0.620730042 |
| ENSMUSG000000102006 | NA            | 2.489280635  | -0.225902011 | 5.476842802 | 0.0299218 | 0.620730042 |
| ENSMUSG00000033377  | Palmd         | 0.566098784  | 7.031612454  | 5.475812662 | 0.0299355 | 0.620730042 |
| ENSMUSG00000086933  | NA            | 2.148722051  | 2.859705277  | 5.484490534 | 0.0299985 | 0.620730042 |
| ENSMUSG00000020844  | Nxn           | -1.050778354 | 3.17928531   | 5.459544957 | 0.0301527 | 0.620730042 |
| ENSMUSG00000025785  | Exosc7        | 1.370195615  | 3.488339614  | 5.459481431 | 0.0301535 | 0.620730042 |
| ENSMUSG00000032194  | Kank2         | 0.494721806  | 8.12846987   | 5.455831785 | 0.0302025 | 0.620730042 |
| ENSMUSG00000024112  | Cacna1h       | -0.552308657 | 7.473862839  | 5.440804473 | 0.0304051 | 0.620730042 |
| ENSMUSG00000043252  | Tmem64        | -0.596822972 | 6.377834656  | 5.438637799 | 0.0304344 | 0.620730042 |
| ENSMUSG00000078517  | Emc1          | -0.773332964 | 4.504814038  | 5.434481677 | 0.0304908 | 0.620730042 |
| ENSMUSG00000044835  | Ankrd45       | -0.708527469 | 5.188983849  | 5.43325702  | 0.0305074 | 0.620730042 |
| ENSMUSG00000047371  | Zfp768        | -0.954790528 | 3.991895853  | 5.429519156 | 0.0305582 | 0.620730042 |
| ENSMUSG00000097151  | NA            | 1.008596499  | 4.041667017  | 5.429504825 | 0.0305584 | 0.620730042 |
| ENSMUSG00000033257  | Ttll4         | 0.559942527  | 5.883868512  | 5.426729668 | 0.0305962 | 0.620730042 |
| ENSMUSG00000016940  | Kctd2         | 1.542493123  | 2.83455374   | 5.426431213 | 0.0306003 | 0.620730042 |
| ENSMUSG00000028016  | Ints12        | -0.594899725 | 5.313739449  | 5.425205052 | 0.0306170 | 0.620730042 |
| ENSMUSG00000089663  | NA            | 1.470706338  | 3.445083956  | 5.409192168 | 0.0308363 | 0.620730042 |
| ENSMUSG00000022617  | Chkb          | 0.752725945  | 5.712688531  | 5.40914753  | 0.0308369 | 0.620730042 |
| ENSMUSG00000078794  | Dact3         | -0.463172478 | 5.957493864  | 5.405347867 | 0.0308892 | 0.620730042 |
| ENSMUSG00000016541  | Atxn10        | -0.52963577  | 6.272210356  | 5.401825718 | 0.0309378 | 0.620730042 |
| ENSMUSG00000021234  | Fam161b       | 1.226987586  | 2.709352703  | 5.401417746 | 0.0309434 | 0.620730042 |
| ENSMUSG00000022999  | Lmbr1l        | 1.016717566  | 3.643654283  | 5.398586524 | 0.0309825 | 0.620730042 |
| ENSMUSG00000090290  | Gm17296       | 1.744531972  | 3.180522193  | 5.398445868 | 0.0309845 | 0.620730042 |
| ENSMUSG00000022261  | Sdc2          | -0.359986774 | 7.312254257  | 5.397070918 | 0.0310035 | 0.620730042 |
| ENSMUSG00000097365  | C030034L19Rik | 2.265005772  | 1.941375793  | 5.37958714  | 0.0312464 | 0.620730042 |
| ENSMUSG00000038143  | Stox2         | -0.338645908 | 7.412382904  | 5.378033796 | 0.0312681 | 0.620730042 |
| ENSMUSG00000030068  | NA            | 1.064591601  | 4.406550276  | 5.374564555 | 0.0313166 | 0.620730042 |
| ENSMUSG00000029480  | Dhx37         | 1.736964418  | 2.873892433  | 5.368699207 | 0.0313988 | 0.620730042 |
| ENSMUSG00000022865  | Cxadr         | -0.481655314 | 6.838259798  | 5.365256161 | 0.0314472 | 0.620730042 |
| ENSMUSG00000046186  | Cd109         | -1.048364369 | 4.326814571  | 5.364993557 | 0.0314509 | 0.620730042 |
| ENSMUSG00000040331  | Nsmce4a       | -1.21393884  | 3.048475331  | 5.361825563 | 0.0314955 | 0.620730042 |



|                     |               |              |              |             |           |             |
|---------------------|---------------|--------------|--------------|-------------|-----------|-------------|
| ENSMUSG00000061458  | Nol10         | 1.070044814  | 3.715712204  | 5.361798869 | 0.0314958 | 0.620730042 |
| ENSMUSG00000050697  | Prkaa1        | 0.664294273  | 5.645153414  | 5.358954947 | 0.0315359 | 0.620730042 |
| ENSMUSG00000098608  | NA            | 2.793325362  | 0.049361066  | 5.356072527 | 0.0315766 | 0.620730042 |
| ENSMUSG00000097451  | NA            | 0.548959699  | 6.339033342  | 5.354663865 | 0.0315965 | 0.620730042 |
| ENSMUSG00000042305  | Tmem183a      | -0.775868303 | 4.633063902  | 5.345457783 | 0.0317269 | 0.620730042 |
| ENSMUSG00000027341  | Tmem230       | -0.821609965 | 4.015876206  | 5.335673275 | 0.0318662 | 0.620730042 |
| ENSMUSG00000032184  | Lysmd2        | 1.938212756  | 2.199836699  | 5.332999468 | 0.0319044 | 0.620730042 |
| ENSMUSG00000025858  | Get4          | 1.533649622  | 2.183179684  | 5.325560613 | 0.0320109 | 0.620730042 |
| ENSMUSG00000090523  | Gypc          | -0.694425104 | 5.503584608  | 5.324156464 | 0.0320311 | 0.620730042 |
| ENSMUSG00000082507  | NA            | 2.454133847  | 0.003100739  | 5.323262518 | 0.0320439 | 0.620730042 |
| ENSMUSG00000022971  | lfnar2        | 1.077792932  | 5.36517582   | 5.364743159 | 0.0320697 | 0.620730042 |
| ENSMUSG00000046546  | Fam43a        | -0.565998744 | 6.135939873  | 5.313606209 | 0.0321829 | 0.620730042 |
| ENSMUSG00000099746  | NA            | 0.830914904  | 4.571816687  | 5.312022548 | 0.0322058 | 0.620730042 |
| ENSMUSG00000045658  | Pid1          | 0.807781428  | 6.039826947  | 5.310937367 | 0.0322482 | 0.620730042 |
| ENSMUSG00000019863  | Qrsl1         | -0.948603394 | 3.753381959  | 5.307422661 | 0.0322723 | 0.620730042 |
| ENSMUSG00000040640  | Erc2          | -0.728278445 | 4.907171319  | 5.306382376 | 0.0322874 | 0.620730042 |
| ENSMUSG00000074743  | Thbd          | 0.663746535  | 5.719261965  | 5.306104238 | 0.0322914 | 0.620730042 |
| ENSMUSG00000055026  | Gabrg3        | -0.961012979 | 6.58509231   | 5.534445566 | 0.0322930 | 0.620730042 |
| ENSMUSG00000025790  | Slco3a1       | -0.472528287 | 8.299830367  | 5.299170115 | 0.0323920 | 0.620730042 |
| ENSMUSG00000079487  | Med12         | 0.421847561  | 7.150531716  | 5.299109637 | 0.0323929 | 0.620730042 |
| ENSMUSG00000031090  | Nadsyn1       | 1.422442757  | 2.654244623  | 5.292822619 | 0.0324845 | 0.620730042 |
| ENSMUSG00000015747  | Vps45         | 0.980263495  | 4.233658644  | 5.289263648 | 0.0325364 | 0.620730042 |
| ENSMUSG00000029313  | Aff1          | 0.440098198  | 7.84805183   | 5.284949361 | 0.0325995 | 0.620730042 |
| ENSMUSG00000048703  | Speer4b       | -1.76619598  | 2.060548271  | 5.282840225 | 0.0326304 | 0.620730042 |
| ENSMUSG00000001053  | N4bp3         | -1.945629911 | 1.982295982  | 5.282800296 | 0.0326310 | 0.620730042 |
| ENSMUSG00000028687  | Mutyh         | 1.796570022  | 2.000159126  | 5.276625902 | 0.0327217 | 0.620730042 |
| ENSMUSG00000036902  | Neto2         | -0.786618111 | 4.199910966  | 5.272898647 | 0.0327765 | 0.620730042 |
| ENSMUSG00000019813  | Cep57l1       | 1.126432039  | 3.456644753  | 5.270183679 | 0.0328166 | 0.620730042 |
| ENSMUSG00000026181  | Ppm1f         | 0.843476963  | 4.52481808   | 5.267635968 | 0.0328542 | 0.620730042 |
| ENSMUSG00000021221  | Dpf3          | 0.715868464  | 4.504951018  | 5.263643717 | 0.0329132 | 0.620730042 |
| ENSMUSG000000101191 | NA            | 1.872905401  | 0.975693517  | 5.25745698  | 0.0330049 | 0.620730042 |
| ENSMUSG00000003929  | Zfp81         | -0.545032264 | 5.781766614  | 5.251866547 | 0.0330881 | 0.620730042 |
| ENSMUSG00000026628  | Atf3          | 1.791933979  | 2.365326507  | 5.248460395 | 0.0331388 | 0.620730042 |
| ENSMUSG00000056014  | A430033K04Rik | 0.909665879  | 3.934355716  | 5.241411034 | 0.0332442 | 0.620730042 |
| ENSMUSG00000007564  | Ppp2r1a       | -0.393939415 | 6.496945491  | 5.241294134 | 0.0332459 | 0.620730042 |
| ENSMUSG00000031075  | Ano1          | 1.347413927  | 3.435508572  | 5.240342998 | 0.0332602 | 0.620730042 |
| ENSMUSG00000060166  | Zdhhc8        | -0.561057246 | 5.768678003  | 5.240072501 | 0.0332642 | 0.620730042 |
| ENSMUSG00000050705  | 2310061I04Rik | 1.223475875  | 3.060685747  | 5.239906893 | 0.0332667 | 0.620730042 |
| ENSMUSG00000066407  | NA            | -2.450001829 | -0.505626403 | 5.239732046 | 0.0332693 | 0.620730042 |
| ENSMUSG00000038542  | Pcid2         | 1.031992228  | 3.590501965  | 5.231977031 | 0.0333858 | 0.620730042 |
| ENSMUSG00000029208  | Guf1          | 0.613360776  | 5.382366397  | 5.231349796 | 0.0333952 | 0.620730042 |
| ENSMUSG00000028645  | Slc2a1        | -0.622114821 | 6.038957197  | 5.230084131 | 0.0334143 | 0.620730042 |
| ENSMUSG00000036879  | Phkb          | -0.496832652 | 6.818348766  | 5.226466143 | 0.0334688 | 0.620730042 |
| ENSMUSG00000038055  | Dexi          | 1.412152371  | 3.271937593  | 5.224843737 | 0.0334933 | 0.620730042 |
| ENSMUSG00000025374  | Nabp2         | 0.703699107  | 5.905606281  | 5.220266024 | 0.0335625 | 0.620730042 |
| ENSMUSG00000003134  | Tbc1d8        | -0.716566484 | 4.6665601    | 5.219383349 | 0.0335759 | 0.620730042 |
| ENSMUSG00000019699  | Akt3          | -0.376502172 | 7.408805787  | 5.218961446 | 0.0335823 | 0.620730042 |
| ENSMUSG00000009575  | Cbx5          | -0.439478861 | 9.438993863  | 5.207898095 | 0.0337503 | 0.622245843 |
| ENSMUSG00000028060  | 2810403A07Rik | 0.38388717   | 7.278161649  | 5.202929632 | 0.0338261 | 0.622245843 |
| ENSMUSG00000098328  | NA            | 0.946590439  | 3.832868229  | 5.202270405 | 0.0338361 | 0.622245843 |
| ENSMUSG00000047749  | Zc3hav1l      | -0.595522321 | 6.835639411  | 5.195541772 | 0.0339391 | 0.622245843 |
| ENSMUSG00000020741  | Cluh          | 0.424538938  | 7.113189531  | 5.195191094 | 0.0339445 | 0.622245843 |
| ENSMUSG00000027219  | Slc28a2       | 1.654928731  | 2.281638577  | 5.193229969 | 0.0339745 | 0.622245843 |
| ENSMUSG00000057766  | Ankrd29       | -0.842728393 | 4.002828115  | 5.174926654 | 0.0342567 | 0.624265228 |
| ENSMUSG000000101995 | NA            | 1.750800719  | 1.616166383  | 5.17455188  | 0.0342625 | 0.624265228 |

|                     |               |              |              |             |           |             |
|---------------------|---------------|--------------|--------------|-------------|-----------|-------------|
| ENSMUSG00000043458  | Pcdhb12       | -1.290359433 | 3.063673215  | 5.171014198 | 0.0343174 | 0.624265228 |
| ENSMUSG00000022438  | Parvb         | -0.36007352  | 7.639211638  | 5.168558555 | 0.0343555 | 0.624265228 |
| ENSMUSG00000070939  | Tgfrap1       | 0.653145615  | 6.233659698  | 5.167372736 | 0.0343740 | 0.624265228 |
| ENSMUSG00000073154  | 9330158H04Rik | -0.750603151 | 5.589017748  | 5.165952047 | 0.0343961 | 0.624265228 |
| ENSMUSG00000003559  | As3mt         | -1.120606019 | 3.592369337  | 5.162055691 | 0.0344568 | 0.624424971 |
| ENSMUSG000000054469 | Lclat1        | -0.304996372 | 9.134511935  | 5.153039304 | 0.0345977 | 0.62443289  |
| ENSMUSG00000023018  | Smarcd1       | -0.737492812 | 4.925786704  | 5.150023634 | 0.0346450 | 0.62443289  |
| ENSMUSG00000042834  | Nrep          | -0.395797938 | 8.43624699   | 5.148707501 | 0.0346656 | 0.62443289  |
| ENSMUSG00000029913  | Prdm5         | -0.632084982 | 5.674339643  | 5.147292718 | 0.0346878 | 0.62443289  |
| ENSMUSG00000003184  | Irf3          | 0.91408977   | 4.488472689  | 5.139748043 | 0.0348066 | 0.62443289  |
| ENSMUSG00000048495  | Tyw5          | 0.835945553  | 4.307627002  | 5.129190674 | 0.0349736 | 0.62443289  |
| ENSMUSG000000036596 | Cpz           | -1.088420019 | 4.003910374  | 5.127167733 | 0.0350057 | 0.62443289  |
| ENSMUSG00000019578  | Ubxn6         | 0.632365274  | 5.195336698  | 5.124859936 | 0.0350423 | 0.62443289  |
| ENSMUSG00000039005  | Tlr4          | 0.967375162  | 5.042173401  | 5.124606816 | 0.0350463 | 0.62443289  |
| ENSMUSG000000053091 | Lins          | 0.962697776  | 3.613486812  | 5.122154073 | 0.0350854 | 0.62443289  |
| ENSMUSG00000073725  | Lmbrd1        | -0.579986763 | 5.198004259  | 5.119654322 | 0.0351252 | 0.62443289  |
| ENSMUSG00000037894  | H2afz         | -0.573182607 | 5.831614688  | 5.110559532 | 0.0352704 | 0.62443289  |
| ENSMUSG00000017314  | Mpp2          | -0.791927732 | 4.941765645  | 5.109709705 | 0.0352841 | 0.62443289  |
| ENSMUSG00000029394  | Cdk2ap1       | 1.85955702   | 1.326664935  | 5.107134758 | 0.0353253 | 0.62443289  |
| ENSMUSG00000008140  | Emc10         | -0.4581804   | 6.319016135  | 5.106268202 | 0.0353392 | 0.62443289  |
| ENSMUSG000000082529 | NA            | 2.474609958  | 0.570803934  | 5.102804647 | 0.0353949 | 0.62443289  |
| ENSMUSG00000028282  | Casp8ap2      | -0.381861553 | 6.585678927  | 5.102222133 | 0.0354042 | 0.62443289  |
| ENSMUSG00000020814  | Mxra7         | 0.711880203  | 5.577328635  | 5.102058933 | 0.0354068 | 0.62443289  |
| ENSMUSG00000029518  | Rab35         | 1.072077925  | 3.330679942  | 5.099590359 | 0.0354466 | 0.62443289  |
| ENSMUSG00000007877  | Tcap          | 0.754790687  | 4.440419862  | 5.094295816 | 0.0355319 | 0.62443289  |
| ENSMUSG000000086602 | NA            | 1.287795812  | 3.235669354  | 5.093149217 | 0.0355505 | 0.62443289  |
| ENSMUSG000000082872 | NA            | -0.842331552 | 3.724609299  | 5.087651961 | 0.0356394 | 0.62443289  |
| ENSMUSG00000042035  | Igfbp3        | -0.446455551 | 6.665098605  | 5.080325119 | 0.0357583 | 0.62443289  |
| ENSMUSG000000054226 | Tprkb         | 0.947153741  | 4.309424653  | 5.079703647 | 0.0357684 | 0.62443289  |
| ENSMUSG000000025266 | Gnl3l         | -0.426452588 | 6.813814011  | 5.077495847 | 0.0358044 | 0.62443289  |
| ENSMUSG000000041889 | Shisa4        | -1.149166605 | 4.2462043    | 5.077369389 | 0.0358064 | 0.62443289  |
| ENSMUSG000000027858 | Tspan2        | -0.696494434 | 4.890009695  | 5.069699563 | 0.0359316 | 0.62510573  |
| ENSMUSG00000070423  | Olfm58        | 1.355227975  | 3.199598931  | 5.067594761 | 0.0359660 | 0.62510573  |
| ENSMUSG000000069793 | Slnf9         | -0.786048864 | 4.688768403  | 5.065468573 | 0.0360009 | 0.62510573  |
| ENSMUSG00000028136  | Snx27         | 0.385681713  | 6.831009586  | 5.048476785 | 0.0362805 | 0.626137802 |
| ENSMUSG000000098714 | Mir7663       | 3.648515593  | -1.545890688 | 5.23859294  | 0.0363176 | 0.626137802 |
| ENSMUSG00000022427  | Tomm22        | 0.830244129  | 4.143270282  | 5.037165333 | 0.0364681 | 0.626137802 |
| ENSMUSG00000016984  | Etaa1         | -1.034886678 | 4.086402558  | 5.036951176 | 0.0364717 | 0.626137802 |
| ENSMUSG00000002227  | Mov10         | 0.823265891  | 4.048760391  | 5.03658145  | 0.0364778 | 0.626137802 |
| ENSMUSG000000030602 | Pak4          | -0.368962805 | 7.450130991  | 5.036004919 | 0.0364874 | 0.626137802 |
| ENSMUSG00000021222  | Dcaf4         | -1.309522669 | 2.655685102  | 5.027730327 | 0.0366254 | 0.626137802 |
| ENSMUSG00000040624  | Plekhg1       | -0.625506522 | 5.650682092  | 5.027355828 | 0.0366316 | 0.626137802 |
| ENSMUSG000000088958 | NA            | 2.834378757  | -0.333385392 | 5.026837452 | 0.0366403 | 0.626137802 |
| ENSMUSG000000025141 | Myadml2       | -1.761891493 | 2.235816172  | 5.024975116 | 0.0366714 | 0.626137802 |
| ENSMUSG000000026207 | Speg          | 0.438252287  | 7.462586654  | 5.024726537 | 0.0366756 | 0.626137802 |
| ENSMUSG000000089072 | NA            | -2.736179873 | -0.467901089 | 5.024182664 | 0.0366847 | 0.626137802 |
| ENSMUSG000000032579 | Hemk1         | -1.669998733 | 2.261856062  | 5.017045558 | 0.0368044 | 0.627291211 |
| ENSMUSG000000032405 | Pias1         | -0.44436105  | 6.486687384  | 5.012081218 | 0.0368879 | 0.627825557 |
| ENSMUSG000000035851 | Ythdc1        | 0.400250798  | 7.276541601  | 5.008272017 | 0.0369522 | 0.628030552 |
| ENSMUSG000000034161 | Scx           | 1.912910538  | 1.143603477  | 4.999259249 | 0.0371047 | 0.629169595 |
| ENSMUSG000000020099 | Unc5b         | -0.401665702 | 7.261078652  | 4.996923633 | 0.0371443 | 0.629169595 |
| ENSMUSG000000054435 | Gimap4        | 0.660315074  | 5.362548513  | 4.995054604 | 0.0371761 | 0.629169595 |
| ENSMUSG000000065049 | NA            | 2.102910616  | 0.105444827  | 4.98838794  | 0.0372896 | 0.630025293 |
| ENSMUSG00000027333  | Smox          | -0.946402274 | 3.832510512  | 4.98594034  | 0.0373313 | 0.630025293 |
| ENSMUSG000000034574 | Daam1         | 0.369197822  | 8.461220296  | 4.978080311 | 0.0374658 | 0.630829415 |



|                    |               |              |              |             |           |             |
|--------------------|---------------|--------------|--------------|-------------|-----------|-------------|
| ENSMUSG00000031004 | Mki67         | -0.506509333 | 8.359993691  | 4.977031072 | 0.0374838 | 0.630829415 |
| ENSMUSG00000020523 | Fam114a2      | 0.698708187  | 5.428131283  | 4.971188699 | 0.0375842 | 0.631635445 |
| ENSMUSG00000059278 | Naa38         | -1.280190723 | 2.38937796   | 4.967956941 | 0.0376399 | 0.631688623 |
| ENSMUSG00000079057 | Cyp4v3        | -1.421694365 | 3.218866269  | 4.9566073   | 0.0378361 | 0.632826206 |
| ENSMUSG00000084139 | NA            | 2.084594648  | 0.194448564  | 4.954926592 | 0.0378653 | 0.632826206 |
| ENSMUSG00000028289 | Epha7         | -0.344222093 | 7.344018879  | 4.954916042 | 0.0378654 | 0.632826206 |
| ENSMUSG00000060862 | Zbtb40        | 0.79379615   | 4.20213805   | 4.950902054 | 0.0379352 | 0.633112332 |
| ENSMUSG00000064372 | NA            | 1.228041729  | 4.137775857  | 4.947239149 | 0.0379989 | 0.633298135 |
| ENSMUSG00000060224 | Pyroxd2       | -1.180975609 | 4.462933839  | 4.938812343 | 0.0381746 | 0.634520948 |
| ENSMUSG00000028969 | Cdk5          | -1.231740844 | 2.842356334  | 4.937003064 | 0.0381778 | 0.634520948 |
| ENSMUSG00000015932 | Dstn          | -0.279287702 | 8.466450778  | 4.930259125 | 0.0382961 | 0.634953971 |
| ENSMUSG00000069565 | Dazap1        | 0.603562077  | 5.217724895  | 4.925336658 | 0.0383828 | 0.634953971 |
| ENSMUSG00000020901 | Pik3r5        | -1.013159521 | 4.433388009  | 4.925313261 | 0.0383832 | 0.634953971 |
| ENSMUSG00000045503 | Sys1          | 1.217130964  | 3.690543168  | 4.920526409 | 0.0384677 | 0.634953971 |
| ENSMUSG00000095205 | NA            | 2.310797339  | -0.617102523 | 4.920525436 | 0.0384677 | 0.634953971 |
| ENSMUSG00000000555 | Itga5         | 0.521384449  | 7.684488942  | 4.912114378 | 0.0386166 | 0.636060762 |
| ENSMUSG00000030168 | Adipor2       | 0.691965145  | 6.084708984  | 4.910771939 | 0.0386404 | 0.636060762 |
| ENSMUSG00000035849 | Krt222        | -0.56701604  | 5.63236278   | 4.896832484 | 0.0388889 | 0.63887384  |
| ENSMUSG00000031230 | Fgf16         | 1.325229084  | 2.547357338  | 4.895233001 | 0.0389175 | 0.63887384  |
| ENSMUSG00000027067 | Ssrp1         | -0.582709551 | 5.471873716  | 4.890652825 | 0.0389996 | 0.639349385 |
| ENSMUSG00000051177 | Plcb1         | 0.520429288  | 6.571176033  | 4.886826737 | 0.0390684 | 0.639604809 |
| ENSMUSG00000051811 | Cox6b2        | 2.021016096  | 2.005396946  | 4.878416262 | 0.0392199 | 0.639686435 |
| ENSMUSG00000021796 | Bmpr1a        | -0.30573085  | 9.365625213  | 4.873592389 | 0.0393072 | 0.639686435 |
| ENSMUSG00000000881 | Dlg3          | 1.092383656  | 3.588402567  | 4.871224504 | 0.0393501 | 0.639686435 |
| ENSMUSG00000096045 | NA            | -1.933565472 | 2.301662613  | 4.870380062 | 0.0393654 | 0.639686435 |
| ENSMUSG00000024258 | Polr2d        | -1.526611851 | 2.079945149  | 4.870087499 | 0.0393707 | 0.639686435 |
| ENSMUSG00000023973 | Cnpy3         | -1.193541155 | 3.895828035  | 4.868885622 | 0.0393925 | 0.639686435 |
| ENSMUSG00000032582 | Rbm6          | 0.480305859  | 6.800234742  | 4.862141899 | 0.0395151 | 0.639686435 |
| ENSMUSG00000087579 | 1500017E21Rik | 1.176034299  | 3.380038267  | 4.854443312 | 0.0396557 | 0.639686435 |
| ENSMUSG00000022364 | Tbc1d31       | 0.825588712  | 5.26608246   | 4.853648177 | 0.0396702 | 0.639686435 |
| ENSMUSG00000035696 | Rnf38         | -0.343348428 | 7.550693012  | 4.845581995 | 0.0398181 | 0.639686435 |
| ENSMUSG00000026600 | Soat1         | -0.541864638 | 5.680867196  | 4.845422247 | 0.0398211 | 0.639686435 |
| ENSMUSG00000034324 | Tmem132c      | -1.441024788 | 3.294614448  | 4.842241352 | 0.0398796 | 0.639686435 |
| ENSMUSG00000024084 | Qpct          | 1.578054281  | 2.838312952  | 4.842138014 | 0.0398815 | 0.639686435 |
| ENSMUSG00000085819 | NA            | 1.456612634  | 1.580065374  | 4.83844696  | 0.0399495 | 0.639686435 |
| ENSMUSG00000022899 | Slc15a2       | 0.758921365  | 4.600964264  | 4.83687229  | 0.0399785 | 0.639686435 |
| ENSMUSG00000061079 | Zfp143        | -0.756082159 | 4.596412266  | 4.835279682 | 0.0400079 | 0.639686435 |
| ENSMUSG00000026208 | Des           | 0.362798294  | 10.83985733  | 4.830355733 | 0.0400990 | 0.639686435 |
| ENSMUSG00000040128 | Pnrc1         | -0.471801124 | 6.26514491   | 4.828618186 | 0.0401312 | 0.639686435 |
| ENSMUSG00000019797 | 1700021F05Rik | 1.019394028  | 4.663218454  | 4.823706788 | 0.0402224 | 0.639686435 |
| ENSMUSG00000037343 | Taf2          | 0.484592924  | 6.578295428  | 4.823529587 | 0.0402257 | 0.639686435 |
| ENSMUSG00000050751 | Pgbd5         | 1.593002588  | 2.701236945  | 4.822511318 | 0.0402446 | 0.639686435 |
| ENSMUSG00000075324 | Fign          | -0.573235787 | 6.807895856  | 4.821430186 | 0.0402648 | 0.639686435 |
| ENSMUSG00000037395 | Rcor3         | -0.49981098  | 6.091764422  | 4.818480951 | 0.0403197 | 0.639686435 |
| ENSMUSG00000029158 | Yipf7         | 1.567975408  | 0.993879799  | 4.81666196  | 0.0403536 | 0.639686435 |
| ENSMUSG00000065433 | Mir370        | 2.983708168  | -0.864456885 | 4.809709308 | 0.0404836 | 0.639686435 |
| ENSMUSG00000028150 | Rorc          | 1.189071439  | 2.821566805  | 4.808427027 | 0.0405076 | 0.639686435 |
| ENSMUSG00000023809 | Rps6ka2       | -0.56748442  | 5.599916672  | 4.808367559 | 0.0405087 | 0.639686435 |
| ENSMUSG00000037583 | Nr0b2         | -1.710468208 | 2.783370502  | 4.802026745 | 0.0406277 | 0.639938332 |
| ENSMUSG00000006205 | Htra1         | -0.743477668 | 4.549863851  | 4.801851294 | 0.0406310 | 0.639938332 |
| ENSMUSG00000064342 | NA            | 1.708971326  | 1.879944286  | 4.797191085 | 0.0407187 | 0.640409122 |
| ENSMUSG00000023089 | Ndufa5        | 0.723210071  | 4.569542966  | 4.791838371 | 0.0408198 | 0.640409122 |
| ENSMUSG00000036792 | Mbd5          | -0.331296983 | 7.244252909  | 4.791796878 | 0.0408206 | 0.640409122 |
| ENSMUSG00000026333 | Gin1          | 0.978477394  | 4.273912221  | 4.775003305 | 0.0411394 | 0.644571074 |
| ENSMUSG00000005034 | Prkacb        | -0.477650916 | 7.041504088  | 4.764954721 | 0.0413316 | 0.644942543 |

|                    |           |              |              |             |           |             |
|--------------------|-----------|--------------|--------------|-------------|-----------|-------------|
| ENSMUSG00000039178 | Tbc1d19   | -0.523497309 | 5.625127344  | 4.764524373 | 0.0413398 | 0.644942543 |
| ENSMUSG00000046916 | Myct1     | 0.815814567  | 4.262504602  | 4.764196828 | 0.0413461 | 0.644942543 |
| ENSMUSG00000039461 | Tcta      | 0.83817033   | 3.759700825  | 4.762559301 | 0.0413775 | 0.644942543 |
| ENSMUSG00000032462 | Pik3cb    | 1.120890416  | 3.590468781  | 4.751065045 | 0.0415988 | 0.645353437 |
| ENSMUSG00000085003 | NA        | 1.522452003  | 1.867148773  | 4.750775112 | 0.0416044 | 0.645353437 |
| ENSMUSG00000074405 | Zfp865    | -0.866478932 | 5.387548891  | 4.750052112 | 0.0416184 | 0.645353437 |
| ENSMUSG00000034216 | Vps18     | 1.230664729  | 3.16313954   | 4.748819512 | 0.0416422 | 0.645353437 |
| ENSMUSG00000040003 | Magi2     | -0.629147702 | 5.382339253  | 4.744915688 | 0.0417178 | 0.645353437 |
| ENSMUSG00000034903 | Cobll1    | 0.360554768  | 7.241118835  | 4.74450946  | 0.0417257 | 0.645353437 |
| ENSMUSG00000059475 | Zfp426    | 0.562045208  | 5.580397397  | 4.737748899 | 0.0418569 | 0.64655251  |
| ENSMUSG00000026842 | Abl1      | -0.436654586 | 6.661790703  | 4.7203867   | 0.0421962 | 0.650957205 |
| ENSMUSG00000039737 | Prkrip1   | 1.144943585  | 4.004523272  | 4.714654464 | 0.0423089 | 0.651810042 |
| ENSMUSG00000057098 | Ebf1      | 0.573819506  | 6.904667896  | 4.711149325 | 0.0423779 | 0.651810042 |
| ENSMUSG00000027522 | Stx16     | 0.462978987  | 6.473899718  | 4.703647283 | 0.0425262 | 0.651810042 |
| ENSMUSG00000031604 | Msmo1     | -0.923448758 | 4.24220382   | 4.702563896 | 0.0425477 | 0.651810042 |
| ENSMUSG00000028884 | Rpa2      | 1.15454181   | 2.393876981  | 4.701319869 | 0.0425724 | 0.651810042 |
| ENSMUSG00000042607 | Asb4      | -1.126949492 | 4.195371198  | 4.698473238 | 0.0426288 | 0.651810042 |
| ENSMUSG00000037306 | Man1c1    | -0.398499187 | 7.184886694  | 4.69838253  | 0.0426306 | 0.651810042 |
| ENSMUSG00000022822 | Abcc5     | 0.415249096  | 6.652115301  | 4.687846957 | 0.0428405 | 0.653164201 |
| ENSMUSG00000054894 | Atp5s     | -0.855172932 | 3.843080911  | 4.687483923 | 0.0428477 | 0.653164201 |
| ENSMUSG00000025485 | Ric8      | -1.070696201 | 3.312915966  | 4.684949445 | 0.0428984 | 0.653164201 |
| ENSMUSG00000077846 | NA        | 1.870040515  | 0.520586652  | 4.683044432 | 0.0429365 | 0.653164201 |
| ENSMUSG00000029486 | Mrpl1     | 0.939187603  | 4.593208697  | 4.677864223 | 0.0430404 | 0.653164201 |
| ENSMUSG00000035783 | Acta2     | 0.434685014  | 8.548008583  | 4.676868796 | 0.0430604 | 0.653164201 |
| ENSMUSG00000092889 | NA        | 2.684794259  | -0.823169598 | 4.67493716  | 0.0430992 | 0.653164201 |
| ENSMUSG00000025413 | Ttc4      | -1.088313263 | 3.966711314  | 4.671667717 | 0.0431650 | 0.653338576 |
| ENSMUSG00000019952 | Poc1b     | -0.892979698 | 4.470003313  | 4.665856347 | 0.0432822 | 0.654290156 |
| ENSMUSG00000085162 | Gm12295   | 0.532198819  | 6.925819278  | 4.651706632 | 0.0435692 | 0.656162079 |
| ENSMUSG00000086741 | Gm15816   | 0.712995097  | 5.013188759  | 4.647788728 | 0.0436491 | 0.656162079 |
| ENSMUSG00000021745 | Ptprg     | 0.385058637  | 7.344667667  | 4.646162823 | 0.0436822 | 0.656162079 |
| ENSMUSG00000021585 | Cast      | 0.57930968   | 5.84821038   | 4.643820508 | 0.0437301 | 0.656162079 |
| ENSMUSG00000053510 | Nrd1      | 0.290391763  | 8.455761705  | 4.634057383 | 0.0439302 | 0.656162079 |
| ENSMUSG00000037692 | Ahdcd1    | -0.49372908  | 6.027675969  | 4.631825774 | 0.0439761 | 0.656162079 |
| ENSMUSG00000032251 | Irak1bp1  | -1.17688833  | 3.425893709  | 4.631279476 | 0.0439874 | 0.656162079 |
| ENSMUSG00000015290 | NA        | -0.558650113 | 5.126457466  | 4.629745101 | 0.0440189 | 0.656162079 |
| ENSMUSG00000035049 | Rrp12     | 0.927885967  | 3.932515661  | 4.62947119  | 0.0440246 | 0.656162079 |
| ENSMUSG00000015882 | Lcorl     | -0.61990909  | 5.809282125  | 4.628281106 | 0.0440491 | 0.656162079 |
| ENSMUSG00000065663 | NA        | 2.020319944  | 0.285797989  | 4.624849199 | 0.0441199 | 0.656162079 |
| ENSMUSG00000028048 | Gba       | -0.73072284  | 4.067861111  | 4.624323347 | 0.0441308 | 0.656162079 |
| ENSMUSG00000019877 | Serinc1   | -0.409203336 | 7.144552972  | 4.622544777 | 0.0441676 | 0.656162079 |
| ENSMUSG00000036768 | Kif15     | -0.980457132 | 4.482471059  | 4.62186442  | 0.0441816 | 0.656162079 |
| ENSMUSG00000030341 | Tnfrsf1a  | -0.686687545 | 4.518245377  | 4.619816577 | 0.0442240 | 0.656162079 |
| ENSMUSG00000068855 | Hist2h2ac | -1.096222564 | 2.85953868   | 4.612870538 | 0.0443681 | 0.656377246 |
| ENSMUSG00000041920 | Slc16a6   | 0.912239153  | 3.390609558  | 4.611890121 | 0.0443885 | 0.656377246 |
| ENSMUSG00000029267 | Mtf2      | 0.566642252  | 5.32779192   | 4.607147542 | 0.0444872 | 0.656377246 |
| ENSMUSG00000025089 | Gfra1     | -0.824702773 | 4.6125892    | 4.607016322 | 0.0444900 | 0.656377246 |
| ENSMUSG00000056602 | Fry       | -0.343915151 | 8.66956282   | 4.605996589 | 0.0445112 | 0.656377246 |
| ENSMUSG00000086451 | NA        | 1.021064575  | 3.296155921  | 4.600540588 | 0.0446252 | 0.65725266  |
| ENSMUSG00000043295 | NA        | 1.668660577  | 1.16684618   | 4.595854751 | 0.0447234 | 0.657765775 |
| ENSMUSG00000004056 | Akt2      | -0.422508522 | 6.759337329  | 4.593662718 | 0.0447694 | 0.657765775 |
| ENSMUSG00000021763 | BC067074  | -0.450671707 | 6.758452221  | 4.588906029 | 0.0448694 | 0.658431276 |
| ENSMUSG00000039328 | Rnf122    | -0.843199915 | 4.206219631  | 4.579323366 | 0.0450717 | 0.659794985 |
| ENSMUSG00000033544 | Angptl1   | -0.875127689 | 3.626219757  | 4.579307555 | 0.0450720 | 0.659794985 |
| ENSMUSG00000054013 | Tmem179   | 1.863694766  | 1.987047169  | 4.5750012   | 0.0451632 | 0.660327204 |
| ENSMUSG00000026828 | Galnt5    | -1.837310963 | 2.330189045  | 4.569320331 | 0.0452839 | 0.661288083 |

|                    |               |              |             |             |           |             |
|--------------------|---------------|--------------|-------------|-------------|-----------|-------------|
| ENSMUSG00000086769 | NA            | 1.557914883  | 2.515338616 | 4.564621996 | 0.0453840 | 0.661946268 |
| ENSMUSG00000021281 | Tnfaip2       | 1.954304865  | 2.304599828 | 4.555878152 | 0.0455709 | 0.662240857 |
| ENSMUSG00000041483 | Zfp281        | -0.580961315 | 5.15177687  | 4.554095159 | 0.0456092 | 0.662240857 |
| ENSMUSG00000032580 | Rbm5          | 0.285578627  | 8.876696018 | 4.55346091  | 0.0456228 | 0.662240857 |
| ENSMUSG00000038619 | Ensa          | 0.722917352  | 4.736186322 | 4.553387445 | 0.0456243 | 0.662240857 |
| ENSMUSG00000009566 | Fpgs          | 1.599118238  | 1.530653613 | 4.550185036 | 0.0456931 | 0.66244004  |
| ENSMUSG00000056124 | B4galt6       | -0.430557322 | 6.756504402 | 4.545636628 | 0.0457910 | 0.663060256 |
| ENSMUSG00000023284 | Zfp605        | -1.037294422 | 3.190459375 | 4.53985035  | 0.0459159 | 0.664069268 |
| ENSMUSG00000097316 | Gm10516       | 0.958665133  | 3.613923656 | 4.531682119 | 0.0460928 | 0.665649095 |
| ENSMUSG00000050538 | NA            | -1.020501656 | 2.991866782 | 4.520110559 | 0.0463448 | 0.665649095 |
| ENSMUSG00000067194 | Eif1ax        | -0.526884386 | 5.568210377 | 4.517877342 | 0.0463936 | 0.665649095 |
| ENSMUSG00000017386 | Traf4         | -0.984742009 | 3.915304047 | 4.51617503  | 0.0464309 | 0.665649095 |
| ENSMUSG00000030047 | Arhgap25      | 1.329632632  | 3.114081347 | 4.505408635 | 0.0466672 | 0.665649095 |
| ENSMUSG00000038119 | Cdon          | -0.380854594 | 7.514650468 | 4.50516892  | 0.0466725 | 0.665649095 |
| ENSMUSG00000034881 | Tbxa2r        | -1.199043755 | 2.849553436 | 4.505095973 | 0.0466741 | 0.665649095 |
| ENSMUSG00000069633 | Pex11g        | 1.055652266  | 4.818517447 | 4.506122777 | 0.0466972 | 0.665649095 |
| ENSMUSG00000032279 | Idh3a         | -0.343645234 | 6.98611159  | 4.503978113 | 0.0466987 | 0.665649095 |
| ENSMUSG00000035305 | Ror1          | 0.583722747  | 5.728056786 | 4.502586335 | 0.0467294 | 0.665649095 |
| ENSMUSG00000062210 | Tnfaip8       | -1.321583903 | 2.9691652   | 4.500483585 | 0.0467758 | 0.665649095 |
| ENSMUSG00000021103 | Mnat1         | -0.967197682 | 3.910292306 | 4.499397399 | 0.0467998 | 0.665649095 |
| ENSMUSG00000047248 | C2cd3         | -0.66850323  | 5.37676469  | 4.496592072 | 0.0468618 | 0.665649095 |
| ENSMUSG00000032294 | Pkm           | -0.38050488  | 6.897678865 | 4.496178802 | 0.0468709 | 0.665649095 |
| ENSMUSG00000025138 | Sirt7         | 0.915243779  | 3.890785883 | 4.494519568 | 0.0469077 | 0.665649095 |
| ENSMUSG00000037242 | Clic4         | -0.382487128 | 8.790567367 | 4.49243361  | 0.0469539 | 0.665649095 |
| ENSMUSG00000031290 | Lrch2         | -0.840171445 | 3.821289833 | 4.491783564 | 0.0469683 | 0.665649095 |
| ENSMUSG00000070942 | Il1rl2        | 1.36474986   | 2.874766275 | 4.487165683 | 0.0470709 | 0.665649095 |
| ENSMUSG00000037364 | Srrt          | 0.517646184  | 5.984567367 | 4.486101674 | 0.0470945 | 0.665649095 |
| ENSMUSG00000065979 | Cpped1        | 0.351411965  | 7.081987547 | 4.484442292 | 0.0471315 | 0.665649095 |
| ENSMUSG00000022941 | Ripply3       | 2.112613731  | 1.917057573 | 4.480251383 | 0.0472249 | 0.665922141 |
| ENSMUSG00000019188 | H13           | -0.75757311  | 5.414489044 | 4.475979651 | 0.0473204 | 0.665922141 |
| ENSMUSG00000063594 | Gng8          | 1.563916792  | 1.34386322  | 4.470688902 | 0.0474389 | 0.665922141 |
| ENSMUSG00000074579 | Lekr1         | 1.232473468  | 3.594410542 | 4.47066576  | 0.0474394 | 0.665922141 |
| ENSMUSG00000097180 | 2700038G22Rik | 1.237207887  | 2.798604674 | 4.469904812 | 0.0474565 | 0.665922141 |
| ENSMUSG00000027823 | Gmps          | -0.362637325 | 7.106334781 | 4.468729601 | 0.0474829 | 0.665922141 |
| ENSMUSG00000020620 | Abca8b        | 0.643903897  | 4.700626362 | 4.464593612 | 0.0475758 | 0.666449519 |
| ENSMUSG00000089224 | NA            | 2.324467183  | 0.336798217 | 4.459797803 | 0.0476839 | 0.666744932 |
| ENSMUSG00000035385 | Ccl2          | 2.301471161  | 1.700020994 | 4.456157871 | 0.0477662 | 0.666744932 |
| ENSMUSG00000044365 | Cxxc4         | -0.885622622 | 4.743597464 | 4.456071657 | 0.0477681 | 0.666744932 |
| ENSMUSG00000031990 | Jam3          | -0.805859247 | 4.098880336 | 4.452701799 | 0.0478444 | 0.666744932 |
| ENSMUSG00000026200 | Glb1l         | -0.960862286 | 4.274962439 | 4.451395031 | 0.0478740 | 0.666744932 |
| ENSMUSG00000070737 | Gm12942       | 2.256316978  | 1.491658285 | 4.444292301 | 0.0480353 | 0.668218295 |
| ENSMUSG00000014859 | E2f4          | 0.601548583  | 4.832203395 | 4.44099508  | 0.0481104 | 0.668490194 |
| ENSMUSG00000075391 | NA            | -1.242823142 | 2.397238225 | 4.432817277 | 0.0482972 | 0.669773742 |
| ENSMUSG00000053286 | Trmt1l        | 0.470517898  | 5.871159558 | 4.432047841 | 0.0483149 | 0.669773742 |
| ENSMUSG00000033578 | Tmem35        | -1.516412973 | 2.225777721 | 4.428556861 | 0.0483949 | 0.669773742 |
| ENSMUSG00000074264 | Amy1          | 1.739660905  | 2.871151649 | 4.424867002 | 0.0484797 | 0.669773742 |
| ENSMUSG00000028613 | Lrp8          | 1.100597183  | 3.630980898 | 4.424690247 | 0.0484838 | 0.669773742 |
| ENSMUSG00000025209 | Peo1          | 1.402963519  | 3.226316876 | 4.422387556 | 0.0485367 | 0.669773742 |
| ENSMUSG00000086928 | NA            | 1.68376827   | 2.996487342 | 4.414492625 | 0.0487189 | 0.671143485 |
| ENSMUSG00000097859 | NA            | 0.884324807  | 3.733733383 | 4.411548879 | 0.0487871 | 0.671143485 |
| ENSMUSG00000043602 | Zfp3          | 0.779741061  | 4.580487987 | 4.407627974 | 0.0488780 | 0.671143485 |
| ENSMUSG00000049090 | Zadh2         | -0.486233593 | 5.85958125  | 4.406138697 | 0.0489126 | 0.671143485 |
| ENSMUSG00000024953 | Prdx5         | -1.189128507 | 3.534747466 | 4.406039554 | 0.0489149 | 0.671143485 |
| ENSMUSG00000065563 | NA            | 1.516117414  | 1.748481469 | 4.399521237 | 0.0490666 | 0.672207324 |
| ENSMUSG00000068747 | Sort1         | -0.389397708 | 7.137431466 | 4.397911308 | 0.0491042 | 0.672207324 |

|                    |         |              |             |             |           |             |
|--------------------|---------|--------------|-------------|-------------|-----------|-------------|
| ENSMUSG00000028518 | Prkaa2  | 0.381833862  | 7.389317315 | 4.39071292  | 0.0492725 | 0.673034029 |
| ENSMUSG00000044562 | Rasip1  | 1.211889372  | 3.560828219 | 4.38884557  | 0.0493162 | 0.673034029 |
| ENSMUSG00000051674 | Dcun1d4 | -0.582768741 | 5.736681775 | 4.388158876 | 0.0493323 | 0.673034029 |
| ENSMUSG00000034024 | Cct2    | -0.464766799 | 6.495293872 | 4.385028695 | 0.0494058 | 0.673173368 |
| ENSMUSG00000023830 | Igf2r   | -0.30141133  | 9.383607035 | 4.380676705 | 0.0495082 | 0.673173368 |
| ENSMUSG00000004393 | Ddx56   | 1.660436199  | 2.079023777 | 4.377871703 | 0.0495744 | 0.673173368 |
| ENSMUSG00000034579 | Pla2g3  | 1.122932983  | 3.170786397 | 4.374011056 | 0.0496655 | 0.673173368 |
| ENSMUSG00000051232 | Tmem199 | 1.465062993  | 2.24022946  | 4.372419977 | 0.0497032 | 0.673173368 |
| ENSMUSG00000031918 | Mtmr2   | -0.479541964 | 5.863667749 | 4.370651583 | 0.0497450 | 0.673173368 |
| ENSMUSG00000036777 | Anln    | -0.71958496  | 5.547420381 | 4.368740386 | 0.0497903 | 0.673173368 |
| ENSMUSG00000049670 | Morn4   | -0.749163486 | 4.768642232 | 4.367873798 | 0.0498109 | 0.673173368 |
| ENSMUSG00000016559 | NA      | -0.626890187 | 4.403055421 | 4.362392691 | 0.0499411 | 0.673173368 |
| ENSMUSG00000018845 | Unc45b  | 0.566853615  | 5.295203196 | 4.361766297 | 0.0499560 | 0.673173368 |

## SI References

1. Horsthuis T, *et al.* (2009) Gene expression profiling of the forming atrioventricular node using a novel Tbx3-based node-specific transgenic reporter. *Circ.Res.* 105(1):61-69.
2. Mohan RA, *et al.* (2018) Embryonic Tbx3+ cardiomyocytes form the mature cardiac conduction system by progressive fate restriction. *Development* 145:1-12.
3. Sergeeva IA, *et al.* (2014) A transgenic mouse model for the simultaneous monitoring of ANF and BNP gene activity during heart development and disease. *Cardiovasc.Res.*:78-86.
4. van Eif VWW, *et al.* (2019) Transcriptome analysis of mouse and human sinoatrial node cells reveals a conserved genetic program. *Development* 146(8):1-15.
5. Sander JD, *et al.* (2010) ZiFiT (Zinc Finger Targeter): an updated zinc finger engineering tool. *Nucleic Acids Res* 38(Web Server issue):W462-468.
6. Moorman AFM, Houweling AC, de Boer PAJ, & Christoffels VM (2001) Sensitive nonradioactive detection of mRNA in tissue sections: novel application of the whole-mount in situ hybridization protocol. *J.Histochem.Cytochem.* 49(1):1-8.
7. Soufan AT, *et al.* (2003) Three-dimensional reconstruction of gene expression patterns during cardiac development. *Physiol Genomics* 13(3):187-195.
8. Boukens BJ, *et al.* (2013) Early repolarization in mice causes overestimation of ventricular activation time by the QRS duration. *Cardiovasc.Res.* 97(1):182-191.
9. Jumrussirikul P, *et al.* (1998) Interaction between neuronal nitric oxide synthase and inhibitory G protein activity in heart rate regulation in conscious mice. *J Clin Invest* 102(7):1279-1285.
10. Mosimann C, *et al.* (2013) Site-directed zebrafish transgenesis into single landing sites with the phiC31 integrase system. *Dev Dyn* 242(8):949-963.
11. Ruijter JM, *et al.* (2009) Amplification efficiency: linking baseline and bias in the analysis of quantitative PCR data. *Nucleic Acids Res.* 37(6):e45.
12. Ruiz-Villalba A, *et al.* (2017) Reference genes for gene expression studies in the mouse heart. *Scientific reports* 7(1):24.
13. Dobin A, *et al.* (2013) STAR: ultrafast universal RNA-seq aligner. *Bioinformatics* 29(1):15-21.
14. Love MI, Huber W, & Anders S (2014) Moderated estimation of fold change and dispersion for RNA-seq data with DESeq2. *Genome biology* 15(12):550.
15. Hebenstreit D, *et al.* (2011) RNA sequencing reveals two major classes of gene expression levels in metazoan cells. *Mol Syst Biol* 7:497.
16. Huang dW, Sherman BT, & Lempicki RA (2009) Systematic and integrative analysis of large gene lists using DAVID bioinformatics resources. *Nat.Protoc.* 4(1):44-57.
17. Li H & Durbin R (2009) Fast and accurate short read alignment with Burrows-Wheeler transform. *Bioinformatics* 25(14):1754-1760.
18. Quinlan AR & Hall IM (2010) BEDTools: a flexible suite of utilities for comparing genomic features. *Bioinformatics* 26(6):841-842.
19. Ramirez F, *et al.* (2016) deepTools2: a next generation web server for deep-sequencing data analysis. *Nucleic Acids Res* 44(W1):W160-165.

20. Gilsbach R, *et al.* (2014) Dynamic DNA methylation orchestrates cardiomyocyte development, maturation and disease. *Nature communications* 5:5288.
21. van den Boogaard M, *et al.* (2012) Genetic variation in T-box binding element functionally affects SCN5A/SCN10A enhancer. *J Clin. Invest* 122(7):2519-2530.
22. Luna-Zurita L, *et al.* (2016) Complex Interdependence Regulates Heterotypic Transcription Factor Distribution and Coordinates Cardiogenesis. *Cell* 164(5):999-1014.
23. Nagai H, *et al.* (2017) Antihypertrophic Effects of Small Molecules that Maintain Mitochondrial ATP Levels Under Hypoxia. *EBioMedicine* 24:147-158.
24. Quaife-Ryan GA, *et al.* (2017) Multicellular Transcriptional Analysis of Mammalian Heart Regeneration. *Circulation* 136(12):1123-1139.
25. Singh R, *et al.* (2009) Tbx20 interacts with smads to confine tbx2 expression to the atrioventricular canal. *Circ.Res.* 105(5):442-452.
26. Munshi NV, *et al.* (2009) Cx30.2 enhancer analysis identifies Gata4 as a novel regulator of atrioventricular delay. *Development* 136(15):2665-2674.
27. van Weerd JH, *et al.* (2014) A Large Permissive Regulatory Domain Exclusively Controls Tbx3 Expression in the Cardiac Conduction System. *Circ.Res.* 115:432-441.
